1 Improved gene annotation of the fungal wheat pathogen  
2 *Zymoseptoria tritici* based on combined Iso-Seq and RNA-Seq  
3 evidence  
4  
5

6 Nicolas Lapalu<sup>1</sup>, Lucie Lamothe<sup>1</sup>, Yohann Petit<sup>1</sup>, Anne Genissel<sup>1</sup>, Camille Delude<sup>2</sup>, Alice Feurtey<sup>3,4</sup>,  
7 Leen N. Abraham<sup>3</sup>, Dan Smith<sup>5</sup>, Robert King<sup>5</sup>, Alison Renwick<sup>6</sup>, Mélanie Appertet<sup>2</sup>, Justine Sucher<sup>2</sup>,  
8 Andrei S. Steindorff<sup>7</sup>, Stephen B. Goodwin<sup>9</sup>, Gert H.J. Kema<sup>11</sup>, Igor V. Grigoriev<sup>7,8</sup>, James Hane<sup>6</sup>, Jason  
9 Rudd<sup>5</sup>, Eva Stukenbrock<sup>10</sup>, Daniel Croll<sup>3</sup>, Gabriel Scalliet<sup>2</sup>, Marc-Henri Lebrun<sup>1</sup>

10

11 <sup>1</sup>Université Paris-Saclay, INRAE, UR1290 BIOGER, Palaiseau, France

12 <sup>2</sup>Syngenta Crop Protection AG, CH-4332 Stein, Switzerland

13 <sup>3</sup>University of Neuchâtel, CH-2000 Neuchâtel, Switzerland

14 <sup>4</sup>ETH Zurich, CH-8092 Zurich, Switzerland

15 <sup>5</sup>Dept of Protecting Crops and the Environment, Rothamsted Research, Harpenden, Herts AL52JQ, UK

16 <sup>6</sup>Centre for Crop and Disease Management, Curtin University, Perth, Australia

17 <sup>7</sup>U.S. Department of Energy Joint Genome Institute, Lawrence Berkeley National Laboratory,

18 Berkeley, CA 94720, USA

19 <sup>8</sup>Department of Plant and Microbial Biology, University of California Berkeley, Berkeley, CA 94720,

20 USA

21 <sup>9</sup>USDA-Agricultural Research Service, West Lafayette, IN 47907-2054, USA

22 <sup>10</sup>Environmental Genomics, Max Planck Institute for Evolutionary Biology, 24306 Plön, Germany and

23 Christian-Albrechts University of Kiel, 24118, Germany

24 <sup>11</sup>Wageningen University and Research, Laboratory of Phytopathology, Wageningen, The Netherlands

25

26

27

28 Corresponding author: Nicolas Lapalu, Marc-Henri Lebrun

29

## 30 Abstract

31

32 Despite large omics datasets, the establishment of a reliable gene annotation is still challenging for  
33 eukaryotic genomes. Here, we used the reference genome of the major fungal wheat pathogen  
34 *Zymoseptoria tritici* (isolate IPO323) as a case study to develop methods to improve eukaryotic gene  
35 prediction. Four previous IPO323 annotations identified 10,933 to 13,260 gene models, but only one  
36 third of these coding sequences (CDS) have identical structures. To resolve these discrepancies and  
37 improve gene models, we generated full-length transcripts using long-read sequencing. This dataset  
38 was used together with other evidence (RNA-Seq transcripts and protein sequences) to generate  
39 novel *ab initio* gene models. The selection of the best structure among novel and existing gene  
40 models was performed according to transcript and protein evidence using InGenAnnot, a novel  
41 bioinformatics suite. Overall, 13,414 re-annotated gene models (RGMs) were predicted, including  
42 671 new genes among which 53 encoded effector candidates. This process corrected many of the  
43 errors (15%) observed in previous gene models (coding sequence fusions, false introns, missing  
44 exons). While fungal genomes have poor annotations of untranslated regions (UTRs), our Iso-Seq  
45 long-read sequences outlined 5' and 3'UTRs for 73% of the RGMs. Alternative transcripts were  
46 identified for 13% of RGMs, mostly due to intron retention (75%), likely corresponding to  
47 unprocessed pre-mRNAs. A total of 353 genes displayed alternative transcripts with combinations of  
48 previously predicted or novel exons. Long non-coding transcripts (lncRNAs) and double-stranded  
49 RNAs from two fungal viruses were also identified. Most lncRNAs corresponded to antisense  
50 transcripts of genes (52%). lncRNAs that were up or down regulated during infection were enriched  
51 in antisense transcripts (70%), suggesting their involvement in the control of gene expression. Our  
52 results showed that combining different *ab initio* gene predictions and evidence-driven curation  
53 using InGenAnnot improved the quality of gene annotations of a compact eukaryotic genome. Our  
54 analysis also provided new insights into the transcriptional landscape of *Z. tritici*, helping develop an  
55 increasingly complex picture of its biology.

56

57 Keywords: Septoria tritici blotch, gene prediction, genome annotation, transcripts, isoforms

## 58 Introduction

59

60 Predicting genes in eukaryotic genomes is a challenging process [1], particularly for fungi with  
61 compact genomes. The quality of a genome annotation depends on supporting evidence for coding  
62 regions, splice junctions and on the algorithms used to derive patterns for predictions [2]. Several  
63 drawbacks for gene annotation were identified in eukaryotic genomes such as the complexity of their  
64 gene structure, with introns difficult to predict without experimental transcript evidence, as well as  
65 the quality of genome assembly when fragmented in contigs. In fungi, genes are generally close to  
66 each other, and frequent overlaps between adjacent transcripts have been observed [3]–[5]. In  
67 addition, fungi have shorter introns (averaging 70-100 bp depending on the species, [6]) compared to  
68 other eukaryotes. These particularities of fungal genomes require specific training of *ab-initio*  
69 prediction software and development of fungal-specific pipelines [7]–[15]. Long-read sequencing is  
70 now used to provide full genome assemblies, reducing drawbacks due to genome fragmentation into  
71 contigs. Experimental transcript evidence has also been improved using transcripts assembled from  
72 RNA-seq short reads, providing large transcript datasets for gene annotation/curation. Iso-Seq long-  
73 read sequencing now provides full-length transcript sequences that bypass problems observed with  
74 the assembly of RNA-Seq short reads such as chimeric transcripts covering adjacent genes [16]. Iso-  
75 Seq also provides transcript isoforms allowing the identification of alternative start, stop and splicing  
76 events. Nevertheless, RNA-Seq reads are still required to quantify the relative abundance of Iso-Seq  
77 transcript isoforms, since Iso-Seq is not quantitative and could reveal rare transcripts likely resulting  
78 from errors of the transcriptional machinery [17]. Combining these two types of transcript  
79 sequencing is needed to avoid drawbacks from each technique [18]. Other omics methods such as  
80 transcription start site sequencing (TSS-seq) or cap-analysis gene expression sequencing (CAGE-seq)  
81 are now available for precise definition of transcript start sites, but these applications are still limited  
82 to model organisms [19], [20].

83

84 We have chosen the reference genome of the major fungal wheat pathogen *Zymoseptoria tritici*  
85 (isolate IPO323) as a case study to improve methods for eukaryotic gene prediction and curation. *Z.*  
86 *tritici* is an ascomycete (class Dothideomycetes, [21]) that causes a major foliar disease of bread and  
87 durum wheat (*Septoria tritici* blotch [22]). The first *Z. tritici* genome sequence was obtained in 2011  
88 for the bread wheat-infecting European reference isolate IPO323 using Sanger sequencing [23]. This  
89 complete genome sequence from telomere to telomere has a size of 39.7 megabases (Mb) and is  
90 composed of 13 core chromosomes (CCs) and 8 accessory chromosomes (ACs). Chromosome-scale  
91 genome assemblies of 22 additional *Z. tritici* isolates from different geographic origins were obtained  
92 using long-read sequencing [24], [25], [26], as well as the genome sequences of four related species  
93 of *Zymoseptoria* (*Z. ardibilae*, *Z. brevis*, *Z. passerinii*, *Z. pseudotritici*) [25]. A large proportion of the  
94 IPO323 *Z. tritici* genome is composed of transposable elements (TEs, 17% to 20%, [27][28]), while the  
95 TE content of other isolates varied between 14% and 21.5% [24], [29], [30].

96

97 Currently, four annotations of the IPO323 *Z. tritici* genome are available. The first was generated by  
98 the Joint Genome Institute in 2011 (JGI, [23]). The second annotation was performed at the Max  
99 Planck Institute for Evolutionary Biology in 2015 (MPI, Germany, [28]). Two other annotations were  
100 generated in 2015 at Rothamsted Research Experimental Station (RRES,[31]) and the Centre for Crop  
101 & Disease Management of Curtin University. Large discrepancies were observed across annotations,  
102 both in gene numbers (10,933 to 13,260) and gene structures (30% of coding sequences (CDS) with  
103 identical structures). In addition, some genes that are important for the infection process of *Z. tritici*  
104 were not predicted. For example, the effector-encoding gene *Avr-Stb6* was located near the telomere  
105 of chromosome 5 by quantitative trait locus (QTL) mapping and genome-wide association study  
106 (GWAS), but it was not predicted in existing IPO323 annotations [32]. Indeed, it was identified by  
107 translating all possible ORFs from the region, and its overall structure (start, stop, two introns) was  
108 only predicted using infection-related RNA-seq data. Clearly, the complete coding potential of this  
109 genome still has not been identified despite the four thorough annotations that have been  
110 developed over the past dozen years.

111

112 To address this problem, we established a novel strategy to annotate a compact eukaryotic genome  
113 using *Z. tritici* as a case study. For this process we generated a large set of full-length cDNA  
114 sequences using PacBio Iso-Seq long reads [33], [34]. We also developed a novel suite of tools,  
115 InGenAnnot, to compare genes models predicted by different *ab initio* software and to select the  
116 best gene model according to transcript (RNA-Seq, Iso-Seq) and protein evidence. A novel set of  
117 13,414 improved gene models was generated. Comparing this annotation to other annotations  
118 revealed systematic errors in previous gene models. Full-length cDNA sequences were also used to  
119 identify alternative transcripts and long, non-coding RNA (lncRNA), improving our understanding of  
120 the transcriptional landscape of *Z. tritici*.

121

122

## 123 Materials and Method

124

### 125 **Available *Z. tritici* IPO323 gene annotations**

126 Currently, four annotations of the *Z. tritici* IPO323 genome are available. The first, with 10,933 gene  
127 models, was developed in 2011 by the Joint Genome Institute with *ab initio* tools FGENESH and  
128 Genewise [8] using EST (expressed sequence tag) and proteome evidence (JGI, [23]). The second  
129 annotation was performed in 2015 by the Max Planck Institute, resulting in 11,839 gene models  
130 (MPI, Germany, [28]) identified with the Fungal Genome Annotation pipeline [35]. This pipeline uses  
131 *ab initio* tools GeneMark-ES, GeneMark-HMM [13] and Augustus [12] combined by EvidenceModeler  
132 [36] with RNA-Seq evidence and keeping as much as possible of the first annotation provided by JGI.  
133 The third annotation was generated in 2015 by the Rothamsted Research Experimental Station (UK)  
134 with 13,862 gene models (RRES, [31]) obtained with the *ab initio* tool MAKER-HMM [11] and RNA-  
135 Seq evidence. The fourth annotation published in 2015 by the Centre for Crop & Disease  
136 Management, Curtin University. (CURTIN, Australia) with 13,260 gene models, was obtained with *ab*  
137 *initio* tool CodingQuarry [37] and RNA-Seq evidence. All gene files used in the annotations by JGI,  
138 MPI, RRES and CURTIN have been made easily accessible (<https://doi.org/10.57745/CVIRIB>) and can  
139 be displayed with a dedicated genome browser ([https://bioinfo.bioger.inrae.fr/portal/genome-  
140 portal/12](https://bioinfo.bioger.inrae.fr/portal/genome-portal/12)) or on the new IPO323 genome web portal at JGI  
141 (<https://mycocosm.jgi.doe.gov/Zymtr1/Zymtr1.home.html>).

142

### 143 **Fungal Isolate, RNA extraction, PacBio Iso-Seq and Illumina RNA-Seq libraries**

144 The reference isolate of *Z. tritici* IPO323 [23] was stored at -80°C as a yeast-like cell suspension (10<sup>7</sup>  
145 cells/mL in 30% glycerol). *Z. tritici* was grown at 18°C in the dark on solid (Yeast extract Peptone  
146 Dextrose (YPD) agar) or liquid (Potato Dextrose Broth (PDB)) media. For RNA production, *Z. tritici*  
147 isolate IPO323 (4-day-old yeast-like cells diluted to 10<sup>5</sup> cells/mL final) was cultivated in 75-mL  
148 agitated liquid cultures (500 mL Erlen flasks, 150 rpm) at 18°C in the dark for 4 days. Different media  
149 were used (Table S3) including Glucose-NO<sub>3</sub> synthetic medium defined as MM-Zt [38]. MM-Zt was  
150 modified by replacing glucose (10 g/L) by different carbon sources (Xylose, Mannitol, Galactose,  
151 Sucrose at 10 g/L). Histone Deacetylase inhibitors such as trichostatin ((TSA, Sigma T8552, 1 μM  
152 final) and SAHA (SAHA, Sigma SML0061, 1 mM final) were added to MM-Zt to express genes located  
153 in genomic regions with repressive chromatin marks [39]. The composition of complex media (Yeast-  
154 Peptone-Dextrose: YPD, Potato-Dextrose-Both: PDB, Glycerol-Nitrate: AE) was already described  
155 [40]. Cultures of IPO323 in YPD and PDB were performed at 18°C and 25°C, while AE cultures were  
156 performed only at 18°C. A total of 14 culture conditions was used for RNA production (Table S3). All  
157 cultures for RNA-Seq were performed in triplicate. Cultures were centrifuged at 3000 rpm for 10  
158 minutes and mycelium pellets were washed with water and frozen with liquid nitrogen. Frozen  
159 mycelium was lyophilized and kept at -80°C until extraction. RNAs were extracted using the Qiagen  
160 Plant RNeasy Kit according to the manufacturer's protocol (Ref. 74904, Qiagen France SAS,  
161 Courtaboeuf, France). Preparation and sequencing of PacBio Iso-Seq libraries were performed by the  
162 INRAE platform Gentyane (<http://gentyane.clermont.inrae.fr>). The SMARTer PCR cDNA Synthesis Kit  
163 (ref 634926, Clontech, Mountain View, CA, USA) was used for polyA-primed first-strand cDNA  
164 synthesis followed by optimized PCR amplification and library preparation using the SMRTbell  
165 Template Prep Kit (ref 101-357-000, Pacific Bioscience, Menlo Park, CA, USA) according to  
166 manufacturer protocols. The cDNA libraries were prepared without size selection and bar coded for  
167 multiplexing. Sequencing was performed on a PacBio SEQUEL (version 1). Illumina RNA-seq single-  
168 stranded libraries were prepared using the NEBNext Poly(A) mRNA Magnetic Isolation Module (NEB  
169 #E7490, New England BioLabs, Ipswich, Massachusetts, USA) and the NEBNext Ultra II Directional  
170 RNA Library Prep Kit for Illumina (NEB #E7765, New England BioLabs, Ipswich, Massachusetts, USA).  
171 Custom 8-bp barcodes were added to each library during the preparation process. Pooled samples  
172 were cleaned with magnetic beads included in the library preparation kit. Each pool was run on a  
173 lane of Illumina HiSeqX (Illumina, San Diego, California, USA) using a 150-cycle paired-end run

174

### 175 **Processing of RNA-seq sequences**

176 RNA-Seq data were cleaned and trimmed with Trimmomatic (v 0.36) [41]. The cleaned sequences  
177 were then mapped to the *Z. tritici* IPO323 genome using STAR (v 2.5.1b, --alignIntronMin 4 --  
178 alignIntronMax 5000 --alignMatesGapMax 5000) [42]. Wig files of uniquely mapped reads were  
179 converted to BigWig files with wigToBigWig (v4). StringTie (v2.1.1) [43] was then used to assemble  
180 the mapped RNA-Seq reads into transcripts with different parameters depending on the depth of  
181 sequencing of libraries and their type (-m 150 --rf --g 0 -f 0.1 -a 10 -j 2 or -j 4). The Trinity script  
182 inchworm\_transcript\_splitter.pl (version 2.8.5) [44] was used to split the transcripts with non-  
183 uniform coverage based on the Jaccard clip method. Clipped transcripts were extracted with home-  
184 made scripts and clustered with Stringtie and associated bam files to obtain transcripts per million  
185 (TPM) counts. All libraries were concatenated into one gff file without merge to avoid loss of  
186 information by fusion of small transcripts into larger ones due to the large number of genes in the *Z.*  
187 *tritici* genome with overlapping untranslated regions (UTRs).

188

### 189 **Processing of Iso-Seq sequences**

190 Iso-Seq raw data were processed with the Iso-Seq V3.2 pipeline from PacBio generating polished  
191 Circular Consensus Sequences (CCS). CCS were then mapped to the *Z. tritici* IPO323 genome with  
192 Gmap (2019-01-31) [45] and unmapped, low-mapping-quality ( $\leq 0$ ) or multi-mapped CCS were  
193 filtered out. The CupCake package (v10.0.0, [https://github.com/Magdoll/cDNA\\_Cupcake](https://github.com/Magdoll/cDNA_Cupcake)) filtered the  
194 isoforms, removing the less-expressed and degraded transcripts using the following tools:  
195 *collapse\_isoforms\_by\_sam.py*, *get\_abundance\_post\_collapse.py*, *filter\_by\_count.py*,  
196 *filter\_away\_subset.py*. Readthrough transcripts were removed using the previous annotations (MPI,  
197 JGI, CURTIN, RRES) with BEDTools intersect [46] with an overlap of 100% for full coding sequences  
198 (CDS) (-F 1.0) and the same strand (-s) of at least 2 CDS. Transcripts mapped on the mitochondrial  
199 genome were filtered out as well. Subsequently, all libraries were processed with *chain\_samples.py*  
200 from CupCake and clustered for stringent selection. Splicing junctions obtained by STAR (SJ.out.tab  
201 files) from Illumina RNA-Seq libraries were used to filter out isoform transcripts with unsupported  
202 junctions. Finally, long-read transcripts fully spanning transposable elements were removed with  
203 BEDTools, giving the final set of transcript evidence.

204

### 205 **Gene prediction and selection of the best gene models**

206 Two gene predictors, Eugene v1.6.1 [10], and LoReAn v2.0 [47], handling long-read transcript  
207 sequences as evidence, were used to perform new annotations. Eugene was launched with the  
208 provided fungal parameters (WAM fungi matrix) and trained with a dataset of proteins from four  
209 genomes of species phylogenetically related to *Z. tritici*: *Cercospora beticola*  
210 (GCF\_002742065.1\_CB0940\_V2); *Ramularia collo-cygni* (GCF\_900074925.1\_version\_1); *Zasmidium*  
211 *cellare* (GCF\_010093935.1\_Zasce1); and *Sphaerulina musiva*  
212 (GCF\_000320565.1\_Septoria\_musiva\_SO2202\_v1.0). Gene structures were predicted with assembled  
213 transcripts from RNA-Seq and a dataset of Dothideomycetes proteins obtained from Uniprot without  
214 *Zymoseptoria* sequences to avoid inference with gene models to be improved. Filtered Iso-Seq  
215 transcripts were used as strongly weighted evidence in model prediction with the parameter  
216 “est\_priority=2”. LoReAn was launched in fungus mode with the Augustus retraining mode using  
217 the same Dothideomycetes Uniprot dataset without *Zymoseptoria* sequences and the same Iso-Seq  
218 transcript dataset used for Eugene. RNA-Seq data were used as a merged mapping file (BAM) by the  
219 pipeline to assemble transcripts and detect splicing sites. The new and previous gene datasets  
220 cleaned for TEs with *ingenannot filter* were annotated for annotation edit distance (AED) [48] scores  
221 using *ingenannot aed* with a fungal protein dataset without any *Zymoseptoria* species, selected Iso-  
222 Seq and RNA-Seq transcripts. AED were computed on gene models only with “--  
223 aed\_tr\_cds\_only” to avoid bias between datasets with or without UTR annotations and with “--  
224 penalty\_overflow 0.25” to penalize gene models with splicing junctions that lacked support  
225 evidence. The best gene models were selected with *ingenannot select* based on a AED of  $\leq 0.3$  for  
226 transcript or an AED of  $\leq 0.1$  for protein evidence. Gene models failing the AED threshold, but  
227 contained in clusters with at least 4 predictions from independent annotations were retained, but  
228 partial gene models (no ATG nor stop codon) were removed. The high number of annotation sources

229 (6) and selection of loci detected by 4 independent annotations, allow us to use stringent AED  
230 thresholds, limiting selection of annotation-specific gene models to well supported structures.

231

232 Potential new gene effectors predicted with *ingenannot rescue\_effector*, were added to the final set.  
233 Transcripts not co-localizing with a selected gene model were tested in 3 frames to analyse the  
234 predicted peptides with the same criteria used to detect small, secreted proteins (SSP) as described  
235 below. UTRs were inferred in two passes with the *ingenannot utr\_refine*. First, after deleting all  
236 previously annotated UTRs and inferring new coordinates from a filtered set of Iso-Seq transcripts.  
237 Second, by inferring UTRs with a filtered set of RNA-seq assembled transcripts, considering only  
238 transcripts with no UTRs from the first step. Both sets were established with the *ingenannot*  
239 *isoform\_ranking* for filtering and ranking UTR isoforms based on RNA-Seq evidence.

240 Gene models from each annotation were compared using their AED scores with *ingenannot*  
241 *aed\_compare* and specific/shared gene models were identified using *ingenannot compare*. BUSCO  
242 [49] analyses with *ascomycota\_odb10* were performed to evaluate the completeness of datasets.

243

#### 244 **Functional annotation and prediction of secreted proteins**

245 Functional annotations of genes obtained using Interproscan 5.0 [50] and Blastp [51] (e-value <1e-5 )  
246 against the NCBI nr databank were then used to perform Gene Ontology annotation [52] with  
247 Blast2GO [53]. Secretomes and effectors were annotated as described in [54]. The secretome was  
248 predicted by a combination of TMHMM (v.2.0) [55], SignalP (v4.1) [56] and TargetP (v1.1b) [57]  
249 results with the following criteria: no more than one transmembrane domain and either a signal  
250 peptide or an extracellular localization prediction. The SSP repertoire was predicted by applying a  
251 size cut-off of 300 amino acids to the predicted secretome and keeping only proteins predicted as  
252 effectors by EffectorP (v2.0).

253

#### 254 **Analysis of Iso-Seq transcript isoforms**

255 The annotation of transcript isoforms was performed with sqanti3 [58] using Iso-Seq transcripts,  
256 previously established to infer UTRs, filtered for UTR length isoforms and low expression levels (less  
257 than 10% of total RNA-Seq reads), using the *ingenannot isoform\_ranking* tool. RNA-Seq reads were  
258 mapped to Iso-Seq transcripts with RSEM v1.3.3 [59] and Differential Isoform Usage (DIU) performed  
259 with tappAS [60] with annotations obtained from sqanti3.

260

#### 261 **Detection of antisense and lncRNA Iso-Seq transcripts**

262 Iso-Seq transcripts annotated as antisense and intergenic with sqanti3 were selected as Putative  
263 long non-coding (lnc) RNAs. Then transcripts shorter than 1 Kb in length [61], overlapping with TEs  
264 and containing an open reading frame (ORF) longer than 100 amino acids predicted with getorf by  
265 EMBOSS [62] were discarded. The resulting “non-coding” transcripts were annotated with CPC2 [63],  
266 and only transcripts without an ORF with a PFAM domain were kept as lncRNAs. featureCounts  
267 (v1.5.1) [64] was used to count reads per transcript, followed by differential expression analysis by  
268 edgeR [65] with the SARTools package (v1.6) [66].

269

#### 270 **Detection of polycistronic Iso-Seq transcripts**

271 For detecting polycistronic mRNAs,, read-through Iso-Seq transcripts that were previously filtered  
272 out were merged to obtain the global counts of genes that were potentially co-transcribed. To  
273 establish a robust list of co-transcribed multi-gene loci, readthrough transcripts were filtered with  
274 the gene reannotation dataset and their Iso-Seq transcripts used as evidence. Only polycistronic  
275 mRNAs supported by independent long-read single transcripts for each gene were conserved and  
276 considered as reliable. Detection of overlaps between transcripts and annotations was performed  
277 with intersect using BEDTools [46].

278

#### 279 **Identification and annotation of mycoviruses**

280 Iso-Seq transcripts not mapping to the *Z. tritici* IPO323 reference genome were clustered with  
281 blastclust. Similarities with known sequences were analysed by *blastn* search against the NCBI nr

282 database. Reconstruction of the full-length sequences of viruses was performed by de-novo assembly  
283 with SPAdes (v3.15.4) [67]. RNA-dependent RNA polymerase sequences from narnaviruses related to  
284 Zt-NV1 were retrieved from NCBI and analyzed using Phylogeny.fr [68]. Alignment of protein  
285 sequences was performed with Muscle 3.8.31 and curated by G-blocks. The phylogenetic analysis  
286 was performed using PhyML 3.1 and the phylogenetic tree was drawn with TreeDyn 198.3.



## 287 Results

288

### 289 **Comparison of existing *Z. tritici* IPO323 genome annotations**

290 The four *Z. tritici* IPO323 genome annotations (MPI, JGI, RRES, and CURTIN), filtered out for TE-  
291 encoding genes, were clustered into 13,225 metagenes corresponding to 26,224 distinct gene  
292 models using only their CDS as reference. Metagenes of InGenAnnot are clusters of overlapping  
293 genes transcribed from the same strand and corresponding to the “gene locus” defined in ParsEval  
294 [69]. To compare the structure of gene models from different annotations, we defined three  
295 categories: a) identical gene models (exactly the same CDS); b) dissimilar gene models (same  
296 metagene but different CDS); and c) specific gene models (CDS found only by one annotation at a  
297 given locus). Only 3,618 identical gene models were shared along the four annotations. When  
298 omitting the JGI annotation, the number of identical gene models among the MPI, RRES, and CURTIN  
299 annotations increased to 6,816 (Figure 1a). The highest numbers of identical gene models between  
300 two annotations were observed for MPI-RRES (8,442), RRES-CURTIN (8,289), and MPI-Curtin (7,981),  
301 while the lowest numbers of identical gene models were observed between JGI and the three other  
302 annotations (4,495, 4,621 and 5,276 for JGI-Curtin, JGI-MPI and JGI-RRES respectively). The RRES and  
303 CURTIN annotations displayed the highest numbers of specific gene models (593 and 436,  
304 respectively), while the MPI annotation displayed the lowest number of specific gene models (12).  
305 The JGI and CURTIN annotations displayed a higher number of dissimilar gene models (4,752 and  
306 3,844, respectively) compared to the other annotations (2,367 and 1,871 for RRES and MPI,  
307 respectively; Figure 1).

308

309 Despite the low numbers of identical gene models across annotations, basic genomic statistics were  
310 similar (Table S1). Still, the number of mono-exonic gene models was higher (1.4 to 1.8 fold) in the  
311 RRES and CURTIN annotations compared to those by the JGI and MPI. Most of these mono-exonic  
312 gene models were only predicted *ab initio* (without transcript or protein evidence) and they were  
313 often specific to a given annotation. The average size of gene models also differed between MPI and  
314 the other annotations (1465 bp compared to 1300 bp). We suspected that this difference could result  
315 from longer gene models corresponding to the fusion of two or more distinct adjacent gene models  
316 that were predicted as single genes by other annotations. Indeed, 533 and 801 gene fusions were  
317 detected in the MPI annotation, corresponding to at least two distinct adjacent gene models in the  
318 RRES and CURTIN annotations, respectively.

319

320 The chromosomal localization of gene models was compared across the four annotations (Table S2).  
321 The JGI, MPI and CURTIN gene models exhibited a similar distribution across chromosomes, while the  
322 RRES annotation displayed twice as many gene models on accessory chromosomes compared to  
323 other annotations. Overall, the low number of identical gene models across annotations (27% of  
324 metagenes) likely resulted from drawbacks of each annotation pipeline. For example, we identified  
325 many gene fusions in the MPI and JGI annotations. We also detected annotation-specific mono-  
326 exonic genes in the CURTIN and RRES annotations. These drawbacks resulted in the accumulation of  
327 both wrong and specific gene models in each annotation.

328

329 To circumvent these problems, we generated a novel annotation of the IPO323 genome relying on  
330 broad transcriptional evidence. This strategy required the construction of an expression dataset  
331 using both publicly available single-stranded RNA-Seq datasets, including wheat leaf infection  
332 kinetics, and newly generated datasets using both long-read sequencing (PacBio Iso-Seq: Iso-Seq) and  
333 short-read sequencing (single-stranded Illumina RNA-Seq: RNA-Seq) (Table S3).

334

### 335 **Iso-Seq based annotation of the IPO323 genome sequence and gene model selection**

336 *Z. tritici* mRNAs used for this study corresponded to a wide array of *in vitro* mycelial growth  
337 conditions (Table S3). These mRNAs were used for the construction of either single-stranded Iso-Seq  
338 cDNA libraries or single-stranded Illumina cDNA libraries. The Iso-Seq sequences from each library  
339 were processed individually (cleaning, assembly) and pooled into a single dataset. Non-redundant

340 Iso-Seq transcripts were selected at each locus using the CupCake chaining tool, giving 22,659 Iso-Seq  
341 transcripts. Some Iso-Seq transcripts corresponded to alternative transcripts differing in their intron  
342 splicing or TSS/TTS (TSS: transcriptional starting site, TTS: transcriptional termination site). The  
343 alternative Iso-Seq transcripts that were either not supported by RNA-Seq or with a relative  
344 abundance lower than 10% according to RNA-Seq in all conditions, were filtered out. This filtering  
345 kept isoforms differentially expressed in a least one condition with a relative abundance over 10%,  
346 providing 21,052 transcripts corresponding to 8,927 loci. Most loci displayed only one isoform (50%),  
347 while other loci had either 2 to 5 isoforms (42%), or at least 6 isoforms (8%).

348  
349 Each single-stranded RNA-Seq library generated in the framework of this study and publicly available  
350 datasets (Table S3) were assembled separately and transcripts with weak expression levels (TPM<1)  
351 were removed. Between 8,600 and 13,000 filtered transcripts were obtained depending on the  
352 library and kept as a separate dataset providing 498,010 single-stranded assembled RNA-Seq  
353 transcripts as evidence. Most existing *ab initio* gene prediction tools use RNA-Seq assembled  
354 transcripts as evidence to infer the structure of gene models. However, currently only a few gene  
355 prediction tools (Eugene [10], LoReAn [47]) can use Iso-Seq transcripts as evidence. These two  
356 softwares were used to annotate the IPO323 genome sequence with Iso-Seq transcripts, RNA-Seq  
357 transcripts and reference fungal protein sequences as evidence. Eugene identified 15,810 gene  
358 models in the *Z. tritici* genome in a two-pass mode and strand-specific prediction allowing  
359 overlapping gene models on opposite strands. This number was reduced to 15,245 gene models after  
360 filtering out genes corresponding to TEs. LoReAn identified 11,537 gene models in the *Z. tritici*  
361 genome without overlapping gene models on the opposite strand, which were reduced to 11,497  
362 after filtering out genes corresponding to TEs. Selection of the best gene model was performed with  
363 InGenAnnot using the novel Eugene and LoReAn gene predictions and the four existing ones (JGI,  
364 MPI, RRES, CURTIN). All these gene models were clustered into 17,147 metagenes.

365  
366 For each comparison InGenAnnot computes an Annotation Edit Distance (AED) [48] that is a distance  
367 either between two gene models or between a gene model and an evidence. AED computing takes  
368 into account the number of overlapping bases, as previously described [48]. Two additional options  
369 were implemented in AED computation, such as a comparison limited to the CDS to avoid bias  
370 between annotations without or with UTRs (provided only by Eugene), and a penalty score of 0.25 on  
371 transcript AED scores in case of incongruence in splicing sites between transcript evidence and the  
372 gene model. Since it is difficult to compare AED values derived from protein evidence to those from  
373 transcript evidence, different AED scores were computed for each type of evidence. The gene models  
374 with the best AED scores with either transcript or protein evidence, or both types of evidence, were  
375 selected based on CDS comparisons. Gene models with an AED of 0.3 for transcript and/or an AED of  
376 0.1 for protein evidence were selected (Figure 2). Gene models failing to pass the AED threshold, but  
377 predicted by at least four independent annotations, were retained to avoid the loss of gene models  
378 with low support from transcript or protein evidence (upper right square in Figure 2 corresponding to  
379 1,846 gene models). These rescued genes models were mostly not conserved across fungi (upper  
380 right red bar in Figure 2) and frequently had low transcriptional support (upper green bar in Figure 2).  
381 For gene models overlapping on opposite strands, only the gene model with the best AED score was  
382 selected. Finally, 97 additional effector-encoding genes were predicted with the *rescue\_effector* tool  
383 of InGenAnnot.

384  
385 Overall, we obtained a final set of 13,414 re-annotated Gene Models (RGMs; File S1, Table S4). In  
386 addition, UTRs were inferred from Iso-Seq transcripts for 7,713 genes, and for 9,856 genes (73%)  
387 when combined with RNA-Seq assembled transcripts. The average and median sizes of 5'UTRs were  
388 315 bp and 156 bp, while they were 389 bp and 220 bp for 3'UTRs (Table S4), close to the values  
389 (mean 5'UTR 275 bp and mean 3'UTR 303 bp) reported recently for the Pezizomycotina *P. anserina*  
390 [70]. A small proportion of genes displayed long 5'UTRs (1 Kbp to 7 Kbp, 6%), and/or long 3'UTRs (1  
391 Kbp to 8.6 kbp, 8.6%).

392

### 393 **Comparison of the reannotated IPO323 gene models with available genome annotations**

394 The 13,414 IPO323 RGMs were compared to gene models predicted by the four previous annotations  
395 (JGI, MPI, RRES, CURTIN). This comparison was first performed using BUSCO and the  
396 *ascomycota\_odb* as reference genes [49]. Higher BUSCO scores (99.4 % identical) were obtained with  
397 RGMs compared to the JGI, MPI and CURTIN annotations (95.7-98.5% identical), while scores  
398 obtained with RRES gene models were similar (99.1 % identical; Table S5). In particular, the JGI  
399 annotation had a high number of fragmented and missing BUSCO genes compared to other  
400 annotations, while the CURTIN annotation had a higher level of duplicated BUSCO genes compared  
401 to other annotations (Table S5). The eight missing BUSCOs in RGMs were reduced to six after manual  
402 inspection. These six RGMs that were missing in BUSCO encoded a Leucyl-tRNA synthetase, a WD40-  
403 repeat-containing domain protein, a Zinc finger protein, a Heavy metal-associated domain protein, a  
404 protein with an HMA domain, a PHD-type protein and a GTP binding domain protein. Their  
405 conservation across fungi is questionable, since a blastp search showed that they are missing from  
406 numerous genomes.

407  
408 The comparison between annotations was then performed using AED scores (Figure 2, S1 and S2). Of  
409 the 13,414 RGMs, 11,568 (86%) passed the AED threshold of 0.3 and 0.1 for transcript and protein  
410 evidence, respectively (Figure 2). In comparison, these numbers decrease to 7,730, 8,936, 9,518 and  
411 10,716 for the JGI, MPI, RRES and CURTIN annotations, respectively (Figure S1). This comparison  
412 showed that RGMs had a higher level of evidence support, followed by the CURTIN annotation, while  
413 JGI was the least-supported annotation. Among the 1,846 RGMs failing to pass the AED threshold,  
414 but rescued as predicted by at least four annotations, 574 have no AED score. This implied that they  
415 were only predicted by *ab-initio* software (see genes with no evidence in Table S6). 224 of these 574  
416 fully *ab-initio* RGMs (40%) were located on the 3' arm of chromosome 7 between positions 1,900,000  
417 and 2,500,000 (Table S6). Almost none of these RGMs was expressed, even during infection. This  
418 region was previously described as carrying a high level of histone H3K27me3 and H3K9me3  
419 modifications mediating transcriptional silencing, similar to those found in accessory chromosomes  
420 [71]. These marks could explain the lack of expression of genes from this region of chromosome 7. In  
421 addition, none of these genes was conserved across fungi, suggesting either a recent origin or an  
422 artefact from annotation pipelines. The other fully *ab-initio* RGMs were more frequently localized on  
423 accessory chromosomes (32-53%) than on core chromosomes (12-16%, Table S6).

424  
425 Among the 13,414 RGMs, 7,888 were identical to at least one gene model from another annotation  
426 (Figure 3), while 3,479 RGMs were identical to all the gene models from the four previous  
427 annotations (Figure 3). Since 3,618 gene models were identical among the four previous annotations  
428 (see above), 139 of these genes were not identical to RGMs. Most of the corresponding 139 RGMs  
429 had a novel start codon that did not change the coding phase of the first open reading frame, leading  
430 to a shorter or longer version of the same protein compared to other annotations. However, these  
431 novel start codons were not necessarily more supported by transcript evidence than those from  
432 previous annotations. Ribosome profiling could help in solving this problem by identifying the real  
433 start codon [72]. 2,047 RGMs either differed from all gene models of other annotations (1,376, Table  
434 S6) or were not predicted by any other annotation (671, specific RGMs, Table S6). Most of the 1,376  
435 RGMs differing from all other annotations had either alternative ATGs (see above) or intron splice  
436 sites supported by transcript evidence. RGMs also included novel gene models resulting from  
437 resolving the structure of incorrectly fused collinear gene models (see below).

438  
439 The 671 specific RGMs were distributed evenly on all chromosomes (Table S6). 117 of these specific  
440 RGMs displayed more than 40% similarity to proteins from other fungi, including 63 with more than  
441 80% similarity. A *tblastn* search against the 31 existing *Zymoseptoria* spp. genome sequences was  
442 performed. Most RGM specific genes were found in other *Z. tritici* strains (File S1), in particular in the  
443 genome of strain ST99CH\_1A5 (571 hits with a at least 75 % identity and 75% coverage), while only a  
444 few hits were found in the most distant species *Z. passerinii* SP63 (22 hits). Overall, 654 of the 671  
445 RGM specific genes (97%) matched at least one *Zymoseptoria* spp. sequence. These new genes were

446 often located in regions with complex patterns of expression. A manual curation of these gene  
447 models will be required to confirm their accuracy.

448

449 One major improvement of RGMs was in resolving the structure of genes that were incorrectly fused  
450 in previous annotations (split RGMs). These genes were identified by detecting overlaps between  
451 gene models from different annotations. This survey revealed a high number of RGMs resulting from  
452 the splitting of fused genes from the MPI and JGI annotations (1,507 and 1,258, respectively, Table  
453 S7), and to a lesser extent from the RRES annotation (701), while these genes were in low number in  
454 the CURTIN annotation (176). The average AED score of split RGMs was better (median AED score:  
455 0.17) than that of the fused gene models (median AED score: 0.34). In addition, most MPI fused  
456 genes (87%) were not supported by transcript evidence, since their AED scores were higher than the  
457 cutoff value ( $>0.3$ , Figure S3). On the reverse, most transcript AED scores of split RGMs (65 %) were  
458 supported by transcript evidence, since their AED scores were lower than the cutoff value ( $0.3 <$ ,  
459 Figure S3). Still, a significant number of split RGMs (494, 35%) had low support from both transcript  
460 and protein evidence (upper right square in Figure S3). These split RGMs were rescued since they  
461 were also identified in other annotations than MPI.

462

463 Overall, these results showed that the split RGMs were better supported by transcript and protein  
464 evidence than the MPI fused genes. The transcript evidence of two randomly chosen MPI fused  
465 genes and their corresponding split RGMs is shown in Figures S4 and S5. Both MPI fused genes had  
466 no Iso-Seq transcript support, while Iso-Seq transcripts supported the corresponding split RGMs.  
467 Assembled RNA-Seq transcripts supporting split RGMs were also observed for RGM-1 and RGM-2  
468 from Figure S4. However, large assembled RNA-Seq transcripts were supporting the fused MPI gene  
469 model from Figure 5. Still, some of these assembled transcripts included alternative introns that were  
470 not supported quantitatively by RNA-seq. We hypothesise that these long, chimeric transcripts were  
471 artefacts of the assembly of RNA-Seq reads from individual genes with overlapping transcripts. The  
472 final proof supporting these split RGMs was obtained by identifying specific expression conditions (13  
473 days post-inoculation, wheat infection, Figure S5) in which RGM-2 was strongly expressed, but not  
474 RGM-1.

475

#### 476 **Functional annotation of the reannotated IPO323 gene models**

477 Functional annotation of predicted proteins deduced from RGMs was performed using both Blast2Go  
478 and InterProScan. 5,593 RGMs exhibited a GO term or an IPR and 2,838 were annotated with at least  
479 one Enzyme Code (EC). As in previous annotations of IPO323 genome sequence [28], [73], several  
480 tools were launched to identify genes encoding putative secreted proteins, including effectors (File  
481 S1). We identified 1,895 genes corresponding to secreted proteins with less stringent criteria than  
482 those used in a previous study that identified 970 secreted proteins using the JGI annotation [43]. All  
483 these 970 genes were identified as RGMs. However, they increased to 1,046 mainly due to the  
484 splitting of fused gene models from the JGI annotation. The RGM secretome included 234 small,  
485 secreted proteins (SSP) according to EffectorP and additional criteria defined in the Materials and  
486 Methods section. Among the 100 SSPs studied previously by Gohari et al. using the JGI annotation  
487 [74], 93 were identified as encoded by RGMs. Still, many structural differences between these RGMs  
488 and the JGI gene models were observed. The effector rescue software of InGeAnnot identified 53  
489 SSPs among which 43 were not found in any previous annotations. Four of these 53 novel SSPs  
490 displayed a significant upregulation during infection compared to *in vitro* culture conditions  
491 (ZtIPO323\_001210, ZtIPO323\_072700, ZtIPO323\_105940 and ZtIPO323\_123970), suggesting a  
492 possible role in infection. In addition, genes encoding effectors missing in previous annotations, such  
493 as *Avr-Stb6*, were now predicted correctly. The new annotation also predicted two additional *Avr-*  
494 *Stb6* paralogs located on chromosome 10 (Figure S6a), while the original *Avr-Stb6* is located at the  
495 end of chromosome 5 (Figure S6b, [32]).

496

#### 497 **Identification of alternative transcripts using combined Iso-Seq and RNA-Seq evidence**

498 The initial set of 21,052 Iso-Seq transcripts used for gene reannotation was filtered to exclude UTR  
499 length isoforms, yielding 11,690 Iso-Seq transcripts corresponding to coding and non-coding loci.  
500 Sqanti3 allocated 10,938 Iso-Seq transcripts to 8,199 RGMs (Table 1). 7,872 of these RGMs had the  
501 same structure as their matching Iso-seq transcripts (full\_splice\_match). The other 327 RGMs,  
502 classified as “ISM” or “genic” by Sqanti3 displayed a structure differing from their matching Iso-seq  
503 transcripts. These gene models were supported either by other evidences (RNA-Seq, protein) or  
504 rescued (*ab initio* only). In most cases, these Iso-Seq transcripts were only partly covering the RGMs,  
505 suggesting that they were partial cDNAs likely due to the early termination of reverse transcription.  
506 2,716 Iso-Seq transcripts were identified as alternative splice variants (25 % of coding transcripts).  
507 They were classified by Squanti3 into the following events: combination of known splicing sites (NIC);  
508 new splicing sites (NNC); intron retention (IR); and genic (Table 1). Most alternative transcripts  
509 corresponded to intron retention events (IR, 75%). Since transcripts could carry a premature  
510 termination codon (PTC) recognized by the non-sense mediated decay (NMD) pathway, they were  
511 screened for potential NMD signals [75], leaving 2,372 alternative transcripts corresponding to 1,742  
512 RGMs. The numbers of RGMs with 2, 3, 4 and at least 5 isoforms were 1,342, 274, 77 and 49,  
513 respectively (Table S8). A total of 337 alternative transcripts corresponded to a novel assembly of  
514 coding exons, 271 to a novel assembly of UTR exons, and 16 to a novel assembly of both (included in  
515 NIC, NNC and Genic events, Table 1). For example, RGM ZtIPO323\_030030, predicted to encode a  
516 putative SSP in a previous study (SSP10, [76]), had an alternative splicing site providing a new exon  
517 and a shorter protein that was reduced by 34% in length at its C-terminus (Figure 4a). The 1,753  
518 remaining isoforms with intron-retention events could correspond to un-spliced transcripts not  
519 detected by our NMD screen. Some alternative transcripts were detected in high amounts by RNA-  
520 Seq, as observed for RGM ZtIPO323\_013330 (Figure 4b) with two intron-retention events. This RGM  
521 has 4 transcript isoforms. The canonical transcript (Iso-Seq 2), corresponding to the structure of the  
522 selected RGM, had 4 splicing sites, one being located in the 5' UTR. Two alternative Iso-Seq  
523 transcripts (Iso-Seq 1 and 2) with one or two intron-retention events were also supported by RNA-  
524 Seq. The last Iso-Seq transcript (n°4) had an alternative splicing of the fourth intron that was not  
525 supported by RNA-Seq data. Some alternative transcript isoforms were used as a major evidence for  
526 selecting the RGM as shown for ZtIPO323\_030030 (Figure 4a) or ZtIPO323\_013090 (Figure S7). These  
527 examples illustrated the difficulty for gene predictors to choose between gene models with complex  
528 alternative splicing events or co-existing isoforms with similar expression levels (Figure 4a).

529

### 530 **Differential expression of Iso-Seq transcript isoforms**

531 RNA-Seq data were used to detect differential isoform usage (DIU) for coding genes. RGMs with  
532 significant DIU between different *in vitro* culture conditions or between infection and *in vitro* culture  
533 conditions were identified using tappAS [29] with a minimal p-value of 0.01. Only 22 RGMs had a DIU  
534 between different culture conditions, in particular between Galactose/Sucrose and Mannose/Xylose  
535 growth media (File S1). Ten of them were associated with GO terms (GTPase activity, ATP and GTP  
536 binding). A total of 163 RGMs displayed a DIU between at least one infection time point and one  
537 culture condition, and 88 (54%) encoded proteins with GO terms (File S1), including 23 secreted  
538 proteins. The number of these genes was too small to perform a GO enrichment test. 30 of these 163  
539 RGMs were specifically up or down regulated during infection compared to all culture conditions  
540 including ZtIPO323\_042160 and ZtIPO323\_042360, encoding proteins without known function, and  
541 ZtIPO323\_043800, encoding a PHD and RING finger domains-containing protein. Two of these 30 DIU  
542 genes (ZtIPO323\_016670 and ZtIPO323\_043500) encoded secreted proteins that were significantly  
543 upregulated at late infection stages (13, 21 dpi). ZtIPO323\_016670 encoded a carbohydrate esterase  
544 from family 8 involved in cell wall modifications and ZtIPO323\_043500 encoded a SSP. Manual  
545 inspection of the RNA-Seq data associated with these DIU RGMs confirmed their differential  
546 expression, but not a different usage of isoforms. Indeed, the isoforms detected during infection  
547 corresponded to a low number of reads compared to *in vitro* culture conditions. This could lead to a  
548 bias in DIU analyses.

549

### 550 **Identification of long non-coding RNAs and survey of their expression**

551 Sqanti3 allocated 752 Iso-Seq transcripts to non-coding loci (Table 1). Among these transcripts, we  
552 identified 395 antisense and 357 intergenic non-coding transcripts. These 752 Iso-seq transcripts  
553 were analyzed for the presence of long non-coding RNAs (lncRNAs). Most previous analyses of fungal  
554 lncRNAs were performed using RNA-Seq data with a 200 bp minimal size cutoff. A single study of  
555 fungal lncRNAs was performed using Iso-seq in *F. graminearum* [77]. This study showed that lncRNAs  
556 were generally larger in size than 1 kb. Therefore, we chose a cutoff value of 1 kb in length for  
557 selecting candidate lncRNAs. *Z. tritici* Iso-seq transcripts overlapping with TEs, smaller than 1 kb in  
558 length and containing an ORF longer than 300 bp (100 amino acids) were discarded. Changing the 1-  
559 kb length threshold to 200 bp only removed 72 lncRNAs. This selection left 398 candidate lncRNAs  
560 (288 antisense and 110 intergenic). As previously observed [77], intergenic lncRNAs are generally  
561 smaller than antisense lncRNAs, explaining the strong impact of size selection on this category.  
562 Filtering ORFs longer than 300 bp removed 343 lncRNAs, representing a large proportion of the 398  
563 candidate lncRNAs (86%). We decided to keep this stringent criterion to select only reliable lncRNAs.  
564 This criterion avoided selecting lncRNAs encoding coding genes not retained by InGenAnnot. For  
565 example, the Iso-Seq PB.5809.X located on chromosome 7 (position 688635 to 690776 bp), for which  
566 Eugene predicted a gene model not retained as an RGM, was removed from candidate lncRNAs using  
567 this criterion. This process selected 55 lncRNAs, among which 3 were labelled as “coding” based on  
568 their coding potential and 1 contained an ORF with a pfam domain. Finally, 51 transcripts were  
569 classified as lncRNAs according to our stringent criteria and 35 of these lncRNAs (68%) were  
570 differentially expressed in at least one pairwise comparison (p-value 0.05). Half of these lncRNAs  
571 were differentially expressed between infection and *in vitro* growth conditions, including 5 that were  
572 up-regulated and 12 down-regulated during infection ( $\log_2FC > 2$ ). Most lncRNAs that were down-  
573 regulated during infection were antisense transcripts (83%). The lncRNA PB1188.1 was down-  
574 regulated during infection compared to all culture conditions (Table S9). This lncRNA was an  
575 antisense transcript of ZtIPO323\_016330, encoding a secreted Subtilisin-like protein, that was up  
576 regulated during infection but down regulated during *in vitro* culture conditions. Another RGM  
577 (ZtIPO323\_037670) encoding a TTL protein (Tubulin tyrosine ligase involved in the posttranslational  
578 modification of tubulin) and its antisense lncRNA PB.2709.1 displayed a negative correlation with  
579 their expression pattern during infection (Table S9). In this case, the antisense lncRNA PB.2709.1 was  
580 up regulated during infection, while the corresponding coding gene ZtIPO323\_037670 was down  
581 regulated.

582

### 583 **Iso-Seq transcripts revealed polycistronic mRNAs**

584 Alignment of Iso-Seq transcripts with RGMs identified 2,625 potential polycistronic transcripts.  
585 Among them, 224 corresponded to polycistronic transcripts containing two to three RGMs on the  
586 same strand supported by independent long-read single-transcript molecules. For example, adjacent  
587 RGMs ZtIPO323\_010430 and ZtIPO323\_010440 were transcribed on the same strand with  
588 overlapping 3'UTR and 5'UTR (Figure 5, red rectangle). Iso-Seq polycistronic single-transcript  
589 molecules covering the two RGMs were detected, as well as single RGM Iso-Seq transcripts (Figure 5,  
590 Iso-Seq track and Iso-Seq polycistronic track). Assembled RNA-Seq reads at this locus mostly  
591 predicted a transcript covering the two RGMs (Figure 5, RNA-Seq transcripts tracks). This long  
592 transcript likely resulted from the wrong assembly of reads from overlapping transcripts. Indeed,  
593 RNA-Seq coverage strongly decreased in the region of the overlap between the two RGMs,  
594 suggesting two independent transcripts (Figure 5, RNA-seq coverage track). This RNA-seq coverage  
595 analysis also suggested that the abundance of the polycistronic transcript was low compared to  
596 single-gene transcripts. Multiple stop codons were present in these polycistronic transcripts,  
597 excluding the possibility of errors in annotated genes for a larger single ORF, as observed for  
598 polycistronic transcripts described in *Agaricomycetes* [78], and *F. graminearum* [77] or *Cordyceps*  
599 *militaris* [79].

600

### 601 **Iso-Seq transcripts encoding fungal mycoviruses**

602 A total of 2,203 Iso-Seq transcripts did not map to the *Z. tritici* IPO323 genome and were discarded  
603 for annotation. These transcripts were clustered and analysed for their similarity with known

604 sequences. The larger cluster of independent Iso-Seq transcripts (1919 sequences) was identical to  
605 Fusarivirus 1 (ZtFV1), already identified by a large-scale fungal transcript analysis [80]. The second  
606 cluster gathered 17 independent Iso-Seq transcripts that were closely related to narnavirus 4 of  
607 *Sclerotinia sclerotiorum* (SsNV4) [81]. As these viral Iso-Seq transcripts were probably obtained by  
608 internal polyA priming, they did not cover the full sequence of the viruses. To rescue the full-length  
609 viral RNA, *de novo*-assembly was performed using RNA-Seq data mapping to the viral Iso-Seq  
610 consensus sequences. RNA-Seq reads corresponding to these two fungal viruses were detected in all  
611 our cDNA libraries. These analyses showed that the ZtFV1 Iso-seq transcript was a full-length viral  
612 sequence. However, the second viral Iso-Seq transcript related to SsNV4 was shorter than the viral  
613 RNA assembled from RNA-Seq reads. This allowed the reconstruction of a full sequence of 3091  
614 nucleotides encoding a protein of 986 amino acids corresponding to a RNA-dependent RNA  
615 polymerase. This new virus, ZtNV1 (*Zymoseptoria tritici* NarnaVirus 1), is as long as SsNV4 (3105bp).  
616 ZtNV1 displayed 71% identity at the nucleotide level and 67% identity (79% similarity) at the protein  
617 level with SsNV4. The phylogenetic tree of viral RNA-dependent RNA polymerases showed that the  
618 ZtNV1 was highly related to narnaviruses from *S. sclerotiorum*, *Plasmopara viticola*, and *Fusarium*  
619 *asiaticum* (Figure S8). IPO323 ZtNV1 sequence was used to screen publicly available *Z. tritici* RNA-seq  
620 datasets. ZtNV1 was identified in all these datasets, but only with very few reads, validating the  
621 ubiquitous presence of the virus in *Z. tritici*. ZtFV1 was also detected in these RNA-seq data in higher  
622 amounts compared to ZtNV1 (70,000 fold).

## 623 Discussion

624

### 625 **Improvement of the *Z. tritici* IPO323 gene models**

626 We developed a new strategy to generate high-quality genome annotations using the fungus *Z. tritici*  
627 as a case study. The major requirement for improving the *Z. tritici* IPO323 genome annotation was  
628 the production of a set of full-length transcript sequences. Gene annotation strongly relies on  
629 transcriptomic data to support the structure of a predicted gene and define its boundaries. The  
630 assembly of RNA-Seq short reads frequently leads to artefacts such as chimeras corresponding to  
631 adjacent genes with overlapping transcripts [16], especially in genomes with a high gene density [37].  
632 Iso-Seq long-read by-pass these artefacts, as it produces sequences from single cDNA molecules  
633 without assembly. Iso-Seq also provides transcript isoforms corresponding to alternative start, stop  
634 and splicing events. Still, Iso-seq has potential pitfalls since this technic is not quantitative. Indeed,  
635 we identified rare Iso-seq transcripts likely corresponding to errors of the transcriptional machinery  
636 (intron retention, polycistronic transcripts). We minimized this error by filtering out low-abundance  
637 Iso-Seq transcripts based on their quantification using short-read RNA-seq. Overall, filtered Iso-seq  
638 transcripts were highly reliable in determining the genome-aligned exon structure of transcripts,  
639 while RNA-Seq offered a quantification of Iso-Seq transcript structures and isoforms.

640

641 The newly established transcriptomic dataset was used to select the best gene models among those  
642 predicted by different *ab initio* software according to their AED transcript scores (transcript  
643 evidence), using InGenAnnot. Protein evidence also helped select the best gene model for genes not  
644 expressed under the conditions used for producing mRNAs. The combination of six *ab initio* software  
645 was needed at two levels. First, a diversity of software was needed to produce a sufficient number of  
646 gene models at each locus to be selected by InGenAnnot. Indeed, none of the *ab initio* software was  
647 able to independently predict all the RGMs (Table S10). The best *ab initio* software, Eugene, only  
648 predicted correctly 76% of the RGMs. Second, the use of different *ab initio* software allowed the  
649 rescue of gene models without evidence (1,846 RGMs predicted by at least 4 different *ab initio*  
650 software). Most rescued RGMs were not conserved across fungi and they had a low transcriptional  
651 support or they were not expressed under the available conditions (upper green bar in Figure 2).  
652 They typically included candidate fungal effectors that could be important for plant-fungal  
653 interactions (File 1). Yet, these rescued RGMs may be artefacts of *ab initio* software, and they need  
654 to be validated manually.

655

656 Overall, our strategy significantly improved the annotation of the *Z. tritici* IPO323 genome, and  
657 missing genes encoding effectors such as Avr-Stb6 were now predicted correctly. In addition, it  
658 revealed different bias in previous annotations. Among the 13,414 RGMs, 2,047 were either different  
659 from all previous gene models (1,376, Table S6) or not predicted in previous annotations (671 RGM-  
660 specific, Table S6). We are confident that changing/adding these RGMs is an improvement in the  
661 prediction as both transcripts and protein evidence supported these changes. The most frequent  
662 discrepancy was the occurrence of fused genes in previous annotations that were split into distinct  
663 RGMs. Most of these fused genes corresponded to RGMs with overlapping transcripts (Figures S4,  
664 S5). Indeed, the assembly of RNA-Seq reads corresponding to such transcripts could have generated  
665 chimeric transcripts, providing erroneous evidence to the software used in these annotations.  
666 Changes in parameters used for RNA-Seq read assembly could reduce the number of chimeric  
667 transcripts. However, Iso-Seq long-read sequencing clearly avoided this artefact and its use as  
668 transcript evidence likely explains the observed improvement in the RGMs. To our knowledge, only  
669 two previous studies improved fungal gene prediction using Iso-Seq transcript long-read sequences  
670 (*C. militaris*, [79]; *F. graminearum*, [77]). We further improved the method used in these papers by  
671 filtering Iso-Seq transcripts according to their abundance, and by creating a method to select the best  
672 gene model according to different *ab initio* annotations and evidence.

673

### 674 **Iso-Seq long reads reveals the complexity of transcripts in *Z. tritici***



675 Identifying transcript isoforms is a major challenge when relying on the assembly of short RNA-seq  
676 reads, as alternative splicing sites could not be easily distinguished. Here, we took advantage of the  
677 full-length cDNAs produced by Iso-Seq long-read sequencing to identify novel exon combinations.  
678 Indeed, the assembly of RNA-Seq reads could be misleading for transcripts with more than one.  
679 However, Iso-Seq sequencing is not a quantitative method and minor transcripts were sequenced.  
680 For example, Iso-Seq transcript isoforms with long UTRs or IR without strong support from RNA-Seq  
681 data were identified in our initial dataset (Figure 4, Figure 5, Figure S5). These low-abundance  
682 transcript isoforms could be produced by the transcriptional machinery either as by-products or to  
683 regulate gene expression. As observed for gene annotation (see before), the best strategy is to filter  
684 Iso-Seq sequences with RNA-Seq data to withdraw transcript isoforms with weak quantitative  
685 support, with the caveat that some transcripts might be excluded. As observed in other fungal  
686 genomes ([77], [82], and references quoted within), most alternative splicing events were intron  
687 retention (IR). Indeed, we identified 58% of alternative transcripts with IR after NMD filtering (Table  
688 1). IR events could generate premature termination codons (PTCs) likely degraded by the NMD  
689 pathway. However, NMD signals are difficult to predict with current bioinformatics tools in  
690 filamentous fungi. DIU analysis revealed a few RGMs with differential expressed transcript isoforms  
691 during infection compared to *in vitro* growth conditions. As discussed before, the small amounts of  
692 RNA-Seq reads available in these conditions makes such comparisons difficult using the available  
693 statistical tools. In fact, manual inspection of several detected loci did not reveal clear patterns of  
694 DIU for alternative transcripts.

695  
696 Additionally, dense genomes, such as *Z. tritici* genome, are suitable for polycistronic transcription, i.e.  
697 the production of mRNA that encode several proteins. Indeed, we identified polycistronic mRNAs in  
698 *Z. tritic* among Iso-Seq long-read transcripts, as already observed in *Agaromycotina* [78] and *F.*  
699 *graminearum* [77] or *C. militaris* [79] using Iso-Seq. However, polycistronic-specific RNA-Seq reads  
700 were always detected in low abundance compared to single-gene transcripts. These RNA-seq data  
701 also showed that polycistronic transcripts mostly corresponded to genes with transcripts overlapping  
702 those from adjacent genes. As Iso-Seq is sensitive enough to detect rare transcripts, it is possible that  
703 these polycistronic transcripts are rare read-through transcripts. This hypothesis is supported by the  
704 fact that *in vitro* culture conditions of yeast known to be associated with increased transcriptional  
705 read-through led to more polycistronic transcripts [83]. Alternatively, these polycistronic transcripts  
706 could be an additional level of transcriptional control.

### 707 **lncRNAs are differentially expressed during wheat infection**

708 lncRNAs are important components of transcriptional and translational regulation [84]. They can act  
709 in *cis* or *trans* of target genes, and modulate their expression by different mechanisms, leading to  
710 either the up-regulation or down-regulation of target genes [84]. Most of studies on fungal lncRNAs  
711 used assembled RNA-Seq reads [85]. This approach could lead to assembly artefacts. Iso-Seq long  
712 reads bypass this problem as entire cDNA molecules were independently sequenced. This process  
713 facilitated the identification of full length, non-chimeric lncRNAs. Using stringent criteria (size > 1000  
714 bp, no ORF > 100 aa, no overlap with TEs), we identified 51 lncRNAs in *Z. tritici*. This number is far  
715 lower than those identified in other fungi (939 in *N. crassa* [86], 352 in *Verticillium dahliae* [87], and  
716 427-819 in *F. graminearum* [77]). This difference could be due to the stringent criteria used for this  
717 study. In fact, when using similar criteria to previous studies, such as keeping all ORFs with no coding  
718 potential independently of their size, we identified 398 lncRNAs. In addition, many lncRNAs identified  
719 in these fungi were detected in specific conditions corresponding to stress [86], [88], and sexual  
720 development which we did not sample [77].

721  
722 We investigated the role of lncRNAs in the wheat leaf infection by *Z. tritici*, and identified that 17 of  
723 the 51 lncRNAs were differentially expressed during plant infection, mostly as antisense transcripts  
724 (Table S9). Among them, two displayed expression patterns opposed to their corresponding coding  
725 genes. The lncRNA PB1188.1 was down-regulated during infection compared to *in vitro* culture  
726 conditions. This lncRNA is an antisense transcript of ZtIPO323\_016330 encoding a secreted Subtilisin-

728 like protein, that is up-regulated during infection. Subtilisin-like proteins are known to be secreted  
729 proteases playing an important role in plant infection [89], [90] and in plant–pathogen interactions  
730 [91], [92]. This negative correlation suggested that the down regulation of lncRNA PB1188.1 during  
731 infection allowed the full expression of ZtIPO323\_016330 in infected leaves. The second lncRNA  
732 (lncRNA PB.2709.1) was up-regulated during infection compared to *in vitro* culture conditions (Table  
733 S8), while its corresponding transcript (ZtIPO323\_037670) was down-regulated during infection. This  
734 transcript encodes a tubulin tyrosin ligase (TTL), a protein involved in the post-translational  
735 modification of tubulin. Thus, reduced expression of a TTL protein could alter tubulin turnover during  
736 infectious growth. The negative correlation observed between the gene expression and the  
737 expression of the corresponding antisense lncRNA suggests that antisense lncRNAs could be involved  
738 in the control of fungal gene expression during infection. Our observation hints at the existence of  
739 co-regulation networks between coding and non-coding transcripts in *Z. tritici* and suggest that this  
740 mode of regulation could be important during infection, as already observed during the infection of  
741 rice leaves by *M. oryzae*, [93]. These examples stress the importance of including lncRNAs in future  
742 studies to gather a comprehensive picture of the expression regulation landscape in *Z. tritici*.

743

#### 744 **RNA mycoviruses are widespread in *Z. tritici***

745 In addition to the genes belonging to the *Z. tritici* genome, we revealed the presence of two RNA  
746 mycoviruses in IPO323. The first one Fusarivirus 1 (Zt-FV1) had been previously identified in *Z. tritici*  
747 by the screening of unmapped fungal RNA-seq reads [80]. We also identified a novel mycovirus, Zt-  
748 NV1 (Figure S8), related to the narnavirus 4 of *Sclerotinia sclerotiorum* (SsNV4) [81]. Using the Isoseq  
749 Zt-FV1 and Zt-NV1 sequences as templates, we retrieved RNA-seq reads corresponding to these  
750 mycoviruses in all of the IPO323 RNA-seq conditions tested, as well as from publicly available *Z. tritici*  
751 RNA-seq data, showing that these mycoviruses are widespread in *Z. tritici*. Zt-FV1 was the most  
752 abundant mycovirus, while Zt-NV1 was only detected as very few reads compared to Zt-FV1  
753 (1/70,000), suggesting that it is a minor virus. Mycovirus are known to induce strong phenotypic  
754 defects in other fungi, so additional studies are needed to evaluate the role of these widespread  
755 mycoviruses in the life cycle of *Z. tritici*, in particular its growth, sporulation and pathogenicity [94].

756

#### 757 **InGenAnot a novel tool for improving gene structure prediction**

758 Many tools [8], [10]–[13], [95] and protocols [96] were established to predict gene models in  
759 eukaryotic genomes. Some were dedicated to fungal genome annotation [15], [35], [37] and were  
760 incorporated in bioinformatics workflows [14]. Evaluation of the reliability of an annotation is not an  
761 easy task. One of the most frequently used tools is the BUSCO software for identification of  
762 conserved proteins to evaluate the completeness and fragmentation of the predicted genes at the  
763 protein level [49]. More recently, new datasets and methods were proposed to test the reliability of  
764 gene annotations, looking deeper into the prediction of intron and exon structures [7]. However, this  
765 evaluation was still based on selected datasets, representing a conserved and partial view of gene  
766 content of a genome. In the case of a genome reannotation, ParsEval could give clues on overlaps of  
767 different versions of annotations with sensitivity and specificity metrics [69]. The most descriptive  
768 tool to evaluate the reliability of an annotation with associated evidence is GAEVAL (available  
769 through AEGeAn [97]), which computes an integrity score weighted by such features as confirmed  
770 introns, annotation coverage and UTR identifications.

771

772 In our new software, we implemented the AED metrics [48], to evaluate the ability of a gene  
773 structure to match with transcript evidence or other gene sets. We improved on previous  
774 implementation of the AED[11] by computing the AED metrics for each type of evidence (transcript  
775 and protein) and using a distinct score for Iso-Seq transcripts when available. Moreover, we allow  
776 penalized scores in case of discrepancy between the predicted structure and evidence, for example,  
777 when predicted splice sites were not supported. This evidence-driven annotation strategy required  
778 an in-depth analysis of data provided as evidence to eliminate potential artefacts. As each tool  
779 implements specific ML models, with different specificity/sensibility for each data source, their  
780 implementation and training parameters are more or less tolerant to particularities such as short CDS

781 length or non-canonical splicing site. The combination of different gene prediction software with  
782 distinct intrinsic characteristics, could be a good way to avoid drawbacks from each software, in  
783 particular when *ab-initio* gene predictors fail to find a consensus gene model. In the same way as  
784 EvidenceModeler [36] or TSEBBA [98], InGenAnnot is able to select the best gene model based on  
785 AED scores with defined evidence thresholds. We used additional criteria to select the best gene  
786 model when evidence was lacking (gene model predicted by all or a minimal number of software).  
787 Since each gene model had AED metrics, it could be compared to other gene sets, allowing post-  
788 filtering or prioritization in the manual curation process.

789

#### 790 **Conclusion**

791 In the era of the massive sequencing of compact fungal genomes, inferring gene models by evidence  
792 is essential and complementary to *ab-initio* gene prediction methods. In this paper, we used the  
793 recent Iso-seq technology and developed a novel software, InGenAnnot, to drastically improve the  
794 gene annotation of *Z. tritici*, an important fungal plant pathogen. We additionally identify lncRNA and  
795 mycoviruses as being expressed during plant infection. We expect that both the improved  
796 sequencing technology and our new software will be used widely to improve the gene prediction of  
797 many species of importance, in particular in plant pathogens with dense genomes, and reveal new  
798 insights into the role of transcriptome complexity in plant-pathogen interactions.

799

800

## 801 Availability of data and materials availability

802 All raw sequencing data generated in this study have been submitted to the NCBI Gene Expression  
803 Omnibus (GEO) under accession GSE218898 with data accessions: GSM6758342 to GSM6758379.  
804 Processed data files of assembled RNA-Seq transcripts and filtered Iso-Seq reads were associated to  
805 the submission. Sequence of the new mycovirus ZtNV1 was deposited to NCBI under accession  
806 OP903463. Previous *Z. tritici* IP0323 gene annotations, new annotations (RGMs, Isoforms, LncRNAs)  
807 and annotation file, denoted file S1 (*z.tritici.IP0323.annotations.txt*), are available at:  
808 <https://doi.org/10.57745/CVIRIB>.

809  
810 A genome browser with all annotations and evidence was set up at:  
811 <https://bioinfo.bioger.inrae.fr/portal/genome-portal/12/>  
812 A new IPO323 genome web site at (<https://mycocosm.jgi.doe.gov/Zymtr1/Zymtr1.home.html>) was  
813 released with new genome annotations.  
814  
815 The InGenAnnot code and project is available at: <https://forgemia.inra.fr/bioger/ingenannot>  
816 Licensed under GNU GPL v3. InGenAnnot documentation is available at  
817 <https://bioger.pages.mia.inra.fr/ingenannot>  
818

## 819 Acknowledgments

820 We are grateful to the Genotoul bioinformatics platform Toulouse Occitanie (Bioinfo Genotoul,  
821 <https://doi.org/10.15454/1.5572369328961167E12>) for providing help and/or computing and/or  
822 storage resource. BIOGER benefits from the support of Saclay Plant Sciences-SPS (ANR-17-EUR-  
823 0007).  
824 We also thank the BARIC workgroup (<https://www.cesgo.org/catibaric/>) for providing storage and  
825 computational resources. Rothamsted Research (JR, DS and RK) co-authors were supported by the  
826 Biotechnology and Biological Scientific Research Council (BBSRC) of the United Kingdom through the  
827 institute strategic grants “20:20 Wheat” and “Designing Future Wheat” (grant numbers  
828 BB/J/00426X/1 and BBS/E/C000I0250). The work (proposal: 10.46936/10.25585/60008023)  
829 conducted by the U.S. Department of Energy Joint Genome Institute (<https://ror.org/04xm1d337>), a  
830 DOE Office of Science User Facility, is supported by the Office of Science of the U.S. Department of  
831 Energy operated under Contract No. DE-AC02-05CH11231.

832

833

## 834 References

- 835 [1] S. L. Salzberg, “Next-generation genome annotation: We still struggle to get it right,” *Genome*  
836 *Biology*, vol. 20, no. 1. 2019, doi: 10.1186/s13059-019-1715-2.
- 837 [2] G. F. Ejigu and J. Jung, “Review on the computational genome annotation of sequences  
838 obtained by next-generation sequencing,” *Biology*, vol. 9, no. 9. 2020, doi:  
839 10.3390/biology9090295.
- 840 [3] M. E. Donaldson, L. A. Ostrowski, K. M. Goulet, and B. J. Saville, “Transcriptome analysis of  
841 smut fungi reveals widespread intergenic transcription and conserved antisense transcript  
842 expression,” *BMC Genomics*, vol. 18, no. 1, 2017, doi: 10.1186/s12864-017-3720-8.
- 843 [4] K. Hansen, C. E. Birse, and N. J. Proudfoot, “Nascent transcription from the *nmt1* and *nmt2*  
844 genes of *Schizosaccharomyces pombe* overlaps neighbouring genes,” *EMBO J.*, vol. 17, no. 11,  
845 1998, doi: 10.1093/emboj/17.11.3066.
- 846 [5] M. Gerads and J. F. Ernst, “Overlapping coding regions and transcriptional units of two  
847 essential chromosomal genes (CCT8, TRP1) in the fungal pathogen *Candida albicans*,” *Nucleic*  
848 *Acids Res.*, vol. 26, no. 22, 1998, doi: 10.1093/nar/26.22.5061.
- 849 [6] D. M. Kupfer *et al.*, “Introns and splicing elements of five diverse fungi,” *Eukaryot. Cell*, vol. 3,  
850 no. 5, 2004, doi: 10.1128/EC.3.5.1088-1100.2004.

- 851 [7] N. Scalzitti, A. Jeannin-Girardon, P. Collet, O. Poch, and J. D. Thompson, “A benchmark study  
852 of ab initio gene prediction methods in diverse eukaryotic organisms,” *BMC Genomics*, vol. 21,  
853 no. 1, p. 293, Apr. 2020, doi: 10.1186/s12864-020-6707-9.
- 854 [8] E. Birney, M. Clamp, and R. Durbin, “GeneWise and Genomewise,” *Genome Res.*, vol. 14, no.  
855 5, pp. 988–995, May 2004, doi: 10.1101/gr.1865504.
- 856 [9] T. Brůna, K. J. Hoff, A. Lomsadze, M. Stanke, and M. Borodovsky, “BRAKER2: automatic  
857 eukaryotic genome annotation with GeneMark-EP+ and AUGUSTUS supported by a protein  
858 database,” *NAR Genomics Bioinforma.*, vol. 3, no. 1, pp. 1–11, Jan. 2021, doi:  
859 10.1093/nargab/lqaa108.
- 860 [10] E. Sallet, J. Gouzy, and T. Schiex, “EuGene: An automated integrative gene finder for  
861 eukaryotes and prokaryotes,” in *Methods in Molecular Biology*, vol. 1962, Humana Press Inc.,  
862 2019, pp. 97–120.
- 863 [11] C. Holt and M. Yandell, “MAKER2: an annotation pipeline and genome-database management  
864 tool for second-generation genome projects,” *BMC Bioinformatics*, vol. 12, no. 1, p. 491, Dec.  
865 2011, doi: 10.1186/1471-2105-12-491.
- 866 [12] M. Stanke, O. Keller, I. Gunduz, A. Hayes, S. Waack, and B. Morgenstern, “AUGUSTUS: ab initio  
867 prediction of alternative transcripts,” *Nucleic Acids Res.*, vol. 34, no. Web Server, pp. W435–  
868 W439, Jul. 2006, doi: 10.1093/nar/gkl200.
- 869 [13] A. Lukashin, “GeneMark.hmm: new solutions for gene finding,” *Nucleic Acids Res.*, vol. 26, no.  
870 4, pp. 1107–1115, Feb. 1998, doi: 10.1093/nar/26.4.1107.
- 871 [14] B. Min, I. V. Grigoriev, and I.-G. Choi, “FunGAP: Fungal Genome Annotation Pipeline using  
872 evidence-based gene model evaluation,” *Bioinformatics*, vol. 33, no. 18, pp. 2936–2937, Sep.  
873 2017, doi: 10.1093/bioinformatics/btx353.
- 874 [15] I. Reid *et al.*, “SnowyOwl: accurate prediction of fungal genes by using RNA-Seq and homology  
875 information to select among ab initio models,” *BMC Bioinformatics*, vol. 15, no. 1, p. 229, Jul.  
876 2014, doi: 10.1186/1471-2105-15-229.
- 877 [16] V. Raghavan, L. Kraft, F. Mesny, and L. Rigerte, “A simple guide to *de novo* transcriptome  
878 assembly and annotation,” *Brief. Bioinform.*, vol. 23, no. 2, pp. 1–30, Mar. 2022, doi:  
879 10.1093/bib/bbab563.
- 880 [17] H. Beiki *et al.*, “Improved annotation of the domestic pig genome through integration of Iso-  
881 Seq and RNA-seq data,” *BMC Genomics*, vol. 20, no. 1, p. 344, Dec. 2019, doi:  
882 10.1186/s12864-019-5709-y.
- 883 [18] S. L. Amarasinghe, S. Su, X. Dong, L. Zappia, M. E. Ritchie, and Q. Gouil, “Opportunities and  
884 challenges in long-read sequencing data analysis,” *Genome Biology*, vol. 21, no. 1. 2020, doi:  
885 10.1186/s13059-020-1935-5.
- 886 [19] A. Casco, A. Gupta, M. Hayes, R. Djavadian, M. Ohashi, and E. Johannsen, “Accurate  
887 Quantification of Overlapping Herpesvirus Transcripts from RNA Sequencing Data,” *J. Virol.*,  
888 vol. 96, no. 2, 2022, doi: 10.1128/jvi.01635-21.
- 889 [20] Y. Chiba *et al.*, “Integration of Single-Cell RNA- and CAGE-seq Reveals Tooth-Enriched Genes,”  
890 *J. Dent. Res.*, vol. 101, no. 5, 2022, doi: 10.1177/00220345211049785.
- 891 [21] W. Quaedvlieg *et al.*, “Zymoseptoria gen. nov.: A new genus to accommodate Septoria-like  
892 species occurring on graminicolous hosts,” *Persoonia Mol. Phylogeny Evol. Fungi*, vol. 26, pp.  
893 57–69, Jun. 2011, doi: 10.3767/003158511X571841.
- 894 [22] Y. Petit-Houdenot, M.-H. Lebrun, and G. Scalliet, “Understanding plant-pathogen interactions  
895 in Septoria tritici blotch infection of cereals,” in *Achieving durable disease resistance in  
896 cereals*, London: Burleigh Dodds Science Publishing, 2021, pp. 263–302.
- 897 [23] S. B. Goodwin *et al.*, “Finished genome of the fungal wheat pathogen *Mycosphaerella*  
898 *graminicola* reveals dispensome structure, chromosome plasticity, and stealth pathogenesis,”  
899 *PLoS Genet.*, vol. 7, no. 6, Jun. 2011, doi: 10.1371/journal.pgen.1002070.
- 900 [24] T. Badet, U. Oggenfuss, L. Abraham, B. A. McDonald, and D. Croll, “A 19-isolate reference-  
901 quality global pangenome for the fungal wheat pathogen *Zymoseptoria tritici*,” *BMC Biol.*, vol.  
902 18, no. 1, Feb. 2020, doi: 10.1186/s12915-020-0744-3.
- 903 [25] A. Feurtey *et al.*, “Genome compartmentalization predates species divergence in the plant

- 904 pathogen genus *Zymoseptoria*,” *BMC Genomics*, vol. 21, no. 1, Aug. 2020, doi:  
905 10.1186/s12864-020-06871-w.
- 906 [26] M. Moller *et al.*, “Recent loss of the Dim2 DNA methyltransferase decreases mutation rate in  
907 repeats and changes evolutionary trajectory in a fungal pathogen,” *PLoS Genet.*, vol. 17, no. 3,  
908 p. e1009448, Mar. 2021, doi: 10.1371/journal.pgen.1009448.
- 909 [27] B. Dhillon, N. Gill, R. C. Hamelin, and S. B. Goodwin, “The landscape of transposable elements  
910 in the finished genome of the fungal wheat pathogen *Mycosphaerella graminicola*,” *BMC*  
911 *Genomics*, vol. 15, no. 1, Dec. 2014, doi: 10.1186/1471-2164-15-1132.
- 912 [28] J. Grandaubert, A. Bhattacharyya, and E. H. Stukenbrock, “RNA-seq-Based gene annotation  
913 and comparative genomics of four fungal grass pathogens in the genus *Zymoseptoria* identify  
914 novel orphan genes and species-specific invasions of transposable elements,” *G3 Genes,*  
915 *Genomes, Genet.*, vol. 5, no. 7, pp. 1323–1333, 2015, doi: 10.1534/g3.115.017731.
- 916 [29] C. Lorrain, A. Feurtey, M. M. Ller, J. Hauelsen, and E. Stukenbrock, “Dynamics of transposable  
917 elements in recently diverged fungal pathogens: Lineage-specific transposable element  
918 content and efficiency of genome defenses,” *G3 Genes, Genomes, Genet.*, vol. 11, no. 4, Apr.  
919 2021, doi: 10.1093/g3journal/jkab068.
- 920 [30] U. Oggenfuss *et al.*, “A population-level invasion by transposable elements triggers genome  
921 expansion in a fungal pathogen,” *Elife*, vol. 10, Sep. 2021, doi: 10.7554/eLife.69249.
- 922 [31] H. Chen *et al.*, “Combined pangenomics and transcriptomics reveals core and redundant  
923 virulence processes in a rapidly evolving fungal plant pathogen,” *BMC Biol.*, vol. 21, no. 1, pp.  
924 1–22, Dec. 2023, doi: 10.1186/s12915-023-01520-6/FIGURES/7.
- 925 [32] Z. Zhong *et al.*, “A small secreted protein in *Zymoseptoria tritici* is responsible for avirulence  
926 on wheat cultivars carrying the *Stb6* resistance gene,” *New Phytol.*, vol. 214, no. 2, pp. 619–  
927 631, Apr. 2017, doi: 10.1111/nph.14434.
- 928 [33] D. An, H. X. Cao, C. Li, K. Humbeck, and W. Wang, “Isoform Sequencing and State-of-Art  
929 Applications for Unravelling Complexity of Plant Transcriptomes,” *Genes (Basel)*, vol. 9, no. 1,  
930 Jan. 2018, doi: 10.3390/genes9010043.
- 931 [34] G. Zhang *et al.*, “PacBio full-length cDNA sequencing integrated with RNA-seq reads drastically  
932 improves the discovery of splicing transcripts in rice,” *Plant J.*, vol. 97, no. 2, pp. 296–305, Jan.  
933 2019, doi: 10.1111/tpj.14120.
- 934 [35] B. J. Haas, Q. Zeng, M. D. Pearson, C. A. Cuomo, and J. R. Wortman, “Approaches to fungal  
935 genome annotation,” *Mycology*, vol. 2, no. 3, pp. 118–141, 2011, doi:  
936 10.1080/21501203.2011.606851.
- 937 [36] B. J. Haas *et al.*, “Automated eukaryotic gene structure annotation using EVIDENCEModeler  
938 and the Program to Assemble Spliced Alignments,” *Genome Biol.*, vol. 9, no. 1, p. R7, Jan.  
939 2008, doi: 10.1186/gb-2008-9-1-r7.
- 940 [37] A. C. Testa, J. K. Hane, S. R. Ellwood, and R. P. Oliver, “CodingQuarry: Highly accurate hidden  
941 Markov model gene prediction in fungal genomes using RNA-seq transcripts,” *BMC Genomics*,  
942 vol. 16, no. 1, p. 170, Dec. 2015, doi: 10.1186/s12864-015-1344-4.
- 943 [38] E. Marchegiani, Y. Sidhu, K. Haynes, and M. H. Lebrun, “Conditional gene expression and  
944 promoter replacement in *Zymoseptoria tritici* using fungal nitrate reductase promoters,”  
945 *Fungal Genet. Biol.*, vol. 79, pp. 174–179, Jun. 2015, doi: 10.1016/j.fgb.2015.04.021.
- 946 [39] L. Meile, J. Peter, G. Puccetti, J. Alassimone, B. A. McDonald, and A. Sánchez-Vallet,  
947 “Chromatin dynamics contribute to the spatiotemporal expression pattern of virulence genes  
948 in a fungal plant pathogen,” *MBio*, vol. 11, no. 5, pp. 1–18, 2020, doi: 10.1128/MBIO.02343-  
949 20/SUPPL\_FILE/MBIO.02343-20-SF005.JPG.
- 950 [40] G. Scalliet *et al.*, “Mutagenesis and Functional Studies with Succinate Dehydrogenase  
951 Inhibitors in the Wheat Pathogen *Mycosphaerella graminicola*,” *PLoS One*, vol. 7, no. 4, p.  
952 e35429, Apr. 2012, doi: 10.1371/journal.pone.0035429.
- 953 [41] A. M. Bolger, M. Lohse, and B. Usadel, “Trimmomatic: a flexible trimmer for Illumina sequence  
954 data,” *Bioinformatics*, vol. 30, no. 15, pp. 2114–20, Aug. 2014, doi:  
955 10.1093/bioinformatics/btu170.
- 956 [42] A. Dobin *et al.*, “STAR: ultrafast universal RNA-seq aligner,” *Bioinformatics*, Oct. 2012, doi:

- 957 10.1093/bioinformatics/bts635.
- 958 [43] M. Pertea, G. M. Pertea, C. M. Antonescu, T.-C. Chang, J. T. Mendell, and S. L. Salzberg,  
959 “StringTie enables improved reconstruction of a transcriptome from RNA-seq reads,” *Nat.*  
960 *Biotechnol.*, vol. 33, no. 3, pp. 290–295, Mar. 2015, doi: 10.1038/nbt.3122.
- 961 [44] B. J. Haas *et al.*, “De novo transcript sequence reconstruction from RNA-seq using the Trinity  
962 platform for reference generation and analysis,” *Nat. Protoc.*, vol. 8, no. 8, pp. 1494–1512,  
963 Aug. 2013, doi: 10.1038/nprot.2013.084.
- 964 [45] T. D. Wu and C. K. Watanabe, “GMAP: a genomic mapping and alignment program for mRNA  
965 and EST sequences,” *Bioinformatics*, vol. 21, no. 9, pp. 1859–1875, May 2005, doi:  
966 10.1093/bioinformatics/bti310.
- 967 [46] A. R. Quinlan and I. M. Hall, “BEDTools: a flexible suite of utilities for comparing genomic  
968 features,” *Bioinformatics*, vol. 26, no. 6, pp. 841–842, Mar. 2010, doi:  
969 10.1093/bioinformatics/btq033.
- 970 [47] D. E. Cook, J. E. Valle-Inclan, A. Pajoro, H. Rovenich, B. P. H. J. Thomma, and L. Faino, “Long-  
971 Read Annotation: Automated Eukaryotic Genome Annotation Based on Long-Read cDNA  
972 Sequencing,” *Plant Physiol.*, vol. 179, no. 1, pp. 38–54, Jan. 2019, doi: 10.1104/pp.18.00848.
- 973 [48] K. Eilbeck, B. Moore, C. Holt, and M. Yandell, “Quantitative measures for the management  
974 and comparison of annotated genomes,” *BMC Bioinformatics*, vol. 10, no. 1, p. 67, Feb. 2009,  
975 doi: 10.1186/1471-2105-10-67.
- 976 [49] M. Manni, M. Berkeley, M. Seppey, F. Simão, and E. Zdobnov, “BUSCO Update: Novel and  
977 Streamlined Workflows along with Broader and Deeper Phylogenetic Coverage for Scoring of  
978 Eukaryotic, Prokaryotic, and Viral Genomes,” *Mol. Biol. Evol.*, vol. 38, no. 10, 2021, doi:  
979 10.1093/MOLBEV/MSAB199.
- 980 [50] P. Jones *et al.*, “InterProScan 5: genome-scale protein function classification,” *Bioinformatics*,  
981 vol. 30, no. 9, p. 1236, 2014, doi: 10.1093/BIOINFORMATICS/BTU031.
- 982 [51] C. Camacho *et al.*, “BLAST+: architecture and applications,” *BMC Bioinformatics*, vol. 10, no. 1,  
983 p. 421, Dec. 2009, doi: 10.1186/1471-2105-10-421.
- 984 [52] Gene Ontology Consortium, “The Gene Ontology (GO) database and informatics resource,”  
985 *Nucleic Acids Res.*, vol. 32, no. 90001, pp. 258D – 261, Jan. 2004, doi: 10.1093/nar/gkh036.
- 986 [53] S. Götz *et al.*, “High-throughput functional annotation and data mining with the Blast2GO  
987 suite,” *Nucleic Acids Res.*, vol. 36, no. 10, p. 3420, 2008, doi: 10.1093/NAR/GKN176.
- 988 [54] E. J. Gay *et al.*, “Large-scale transcriptomics to dissect 2 years of the life of a fungal  
989 phytopathogen interacting with its host plant,” *BMC Biol.*, vol. 19, no. 1, Dec. 2021, doi:  
990 10.1186/s12915-021-00989-3.
- 991 [55] S. Möller, M. D. R. Croning, and R. Apweiler, “Evaluation of methods for the prediction of  
992 membrane spanning regions,” *Bioinformatics*, vol. 17, no. 7, pp. 646–653, 2001, doi:  
993 10.1093/bioinformatics/17.7.646.
- 994 [56] H. Nielsen, “Predicting secretory proteins with signalP,” in *Methods in Molecular Biology*, vol.  
995 1611, Humana Press Inc., 2017, pp. 59–73.
- 996 [57] J. J. A. Armenteros *et al.*, “Detecting sequence signals in targeting peptides using deep  
997 learning,” *Life Sci. Alliance*, vol. 2, no. 5, 2019, doi: 10.26508/lsa.201900429.
- 998 [58] M. Tardaguila *et al.*, “SQANTI: Extensive characterization of long-read transcript sequences for  
999 quality control in full-length transcriptome identification and quantification,” *Genome Res.*,  
1000 vol. 28, no. 3, pp. 396–411, Mar. 2018, doi: 10.1101/gr.222976.117.
- 1001 [59] B. Li and C. N. Dewey, “RSEM: Accurate transcript quantification from RNA-Seq data with or  
1002 without a reference genome,” *BMC Bioinformatics*, vol. 12, no. 1, p. 323, Aug. 2011, doi:  
1003 10.1186/1471-2105-12-323.
- 1004 [60] L. De La Fuente *et al.*, “TappAS: A comprehensive computational framework for the analysis of  
1005 the functional impact of differential splicing,” *Genome Biol.*, vol. 21, no. 1, p. 119, May 2020,  
1006 doi: 10.1186/s13059-020-02028-w.
- 1007 [61] I. V. Novikova, S. P. Hennesly, and K. Y. Sanbonmatsu, “Sizing up long non-coding RNAs: Do  
1008 lncRNAs have secondary and tertiary structure?,” *Bioarchitecture*, vol. 2, no. 6, pp. 189–199,  
1009 Nov. 2012, doi: 10.4161/bioa.22592.

- 1010 [62] P. Rice, L. Longden, and A. Bleasby, "EMBOSS: The European Molecular Biology Open  
1011 Software Suite," *Trends in Genetics*, vol. 16, no. 6. Elsevier Ltd, pp. 276–277, Jun. 01, 2000,  
1012 doi: 10.1016/S0168-9525(00)02024-2.
- 1013 [63] Y. J. Kang *et al.*, "CPC2: A fast and accurate coding potential calculator based on sequence  
1014 intrinsic features," *Nucleic Acids Res.*, vol. 45, no. W1, pp. W12–W16, Jul. 2017, doi:  
1015 10.1093/nar/gkx428.
- 1016 [64] Y. Liao, G. K. Smyth, and W. Shi, "featureCounts: an efficient general purpose program for  
1017 assigning sequence reads to genomic features," *Bioinformatics*, vol. 30, no. 7, pp. 923–930,  
1018 Apr. 2014, doi: 10.1093/bioinformatics/btt656.
- 1019 [65] M. D. Robinson, D. J. McCarthy, and G. K. Smyth, "edgeR: a Bioconductor package for  
1020 differential expression analysis of digital gene expression data," *Bioinformatics*, vol. 26, no. 1,  
1021 pp. 139–140, Jan. 2010, doi: 10.1093/bioinformatics/btp616.
- 1022 [66] H. Varet, L. Brillet-Guéguen, J.-Y. Coppée, and M.-A. Dillies, "SARTools: A DESeq2- and EdgeR-  
1023 Based R Pipeline for Comprehensive Differential Analysis of RNA-Seq Data," *PLoS One*, vol. 11,  
1024 no. 6, p. e0157022, Jun. 2016, doi: 10.1371/journal.pone.0157022.
- 1025 [67] A. Bankevich *et al.*, "SPAdes: A new genome assembly algorithm and its applications to single-  
1026 cell sequencing," *J. Comput. Biol.*, vol. 19, no. 5, pp. 455–477, May 2012, doi:  
1027 10.1089/cmb.2012.0021.
- 1028 [68] A. Dereeper *et al.*, "Phylogeny.fr: robust phylogenetic analysis for the non-specialist," *Nucleic  
1029 Acids Res.*, vol. 36, no. Web Server issue, 2008, doi: 10.1093/NAR/GKN180.
- 1030 [69] D. S. Standage and V. P. Brendel, "ParsEval: Parallel comparison and analysis of gene structure  
1031 annotations," *BMC Bioinformatics*, vol. 13, no. 1, p. 187, Aug. 2012, doi: 10.1186/1471-2105-  
1032 13-187.
- 1033 [70] G. Lelandais, D. Remy, F. Malagnac, and P. Grognet, "New insights into genome annotation in  
1034 *Podospira anserina* through re-exploiting multiple RNA-seq data," *BMC Genomics*, vol. 23, no.  
1035 1, p. 859, 2022, doi: 10.1186/s12864-022-09085-4.
- 1036 [71] K. Schotanus *et al.*, "Histone modifications rather than the novel regional centromeres of  
1037 *Zymoseptoria tritici* distinguish core and accessory chromosomes," *Epigenetics and  
1038 Chromatin*, vol. 8, no. 1, Oct. 2015, doi: 10.1186/s13072-015-0033-5.
- 1039 [72] N. T. Ingolia, "Ribosome profiling: New views of translation, from single codons to genome  
1040 scale," *Nature Reviews Genetics*, vol. 15, no. 3. Nature Publishing Group, pp. 205–213, Mar.  
1041 28, 2014, doi: 10.1038/nrg3645.
- 1042 [73] A. Morais do Amaral, J. Antoniw, J. J. Rudd, and K. E. Hammond-Kosack, "Defining the  
1043 Predicted Protein Secretome of the Fungal Wheat Leaf Pathogen *Mycosphaerella  
1044 graminicola*," *PLoS One*, vol. 7, no. 12, p. e49904, Dec. 2012, doi:  
1045 10.1371/journal.pone.0049904.
- 1046 [74] A. M. Gohari *et al.*, "Effector discovery in the fungal wheat pathogen *Zymoseptoria tritici*,"  
1047 *Mol. Plant Pathol.*, vol. 16, no. 9, pp. 931–945, Dec. 2015, doi: 10.1111/MPP.12251.
- 1048 [75] Y. Zhang and M. S. Sachs, "Control of mRNA stability in fungi by NMD, EJC and CBC factors  
1049 through 3'UTR introns," *Genetics*, vol. 200, no. 4, pp. 1133–1148, Aug. 2015, doi:  
1050 10.1534/genetics.115.176743.
- 1051 [76] A. Mirzadi Gohari *et al.*, "Effector discovery in the fungal wheat pathogen *Zymoseptoria  
1052 tritici*," *Mol. Plant Pathol.*, vol. 16, no. 9, pp. 931–945, Dec. 2015, doi: 10.1111/mpp.12251.
- 1053 [77] P. Lu *et al.*, "Landscape, complexity and regulation of a filamentous fungal transcriptome 1  
1054 Corresponding author: 8 Running Title: Full-length transcriptome of *F. graminearum* 12,"  
1055 *bioRxiv*, p. 2021.11.08.467853, Nov. 2021, doi: 10.1101/2021.11.08.467853.
- 1056 [78] S. P. Gordon *et al.*, "Widespread Polycistronic Transcripts in Fungi Revealed by Single-  
1057 Molecule mRNA Sequencing," *PLoS One*, vol. 10, no. 7, p. e0132628, Jul. 2015, doi:  
1058 10.1371/journal.pone.0132628.
- 1059 [79] Y. Chen *et al.*, "Study of the whole genome, methylome and transcriptome of *Cordyceps  
1060 militaris*," *Sci. Rep.*, vol. 9, no. 1, pp. 1–15, Dec. 2019, doi: 10.1038/s41598-018-38021-4.
- 1061 [80] K. B. Gilbert, E. E. Holcomb, R. L. Allscheid, and J. C. Carrington, "Hiding in plain sight: New  
1062 virus genomes discovered via a systematic analysis of fungal public transcriptomes," *PLoS*



- 1063 *One*, vol. 14, no. 7, Jul. 2019, doi: 10.1371/journal.pone.0219207.
- 1064 [81] J. Jia *et al.*, “Interannual dynamics, diversity and evolution of the virome in *Sclerotinia*
- 1065 *sclerotiorum* from a single crop field,” *Virus Evol.*, vol. 7, no. 1, Jan. 2021, doi:
- 1066 10.1093/ve/veab032.
- 1067 [82] J. Jeon *et al.*, “Alternative splicing diversifies the transcriptome and proteome of the rice blast
- 1068 fungus during host infection,” *RNA Biol.*, vol. 19, no. 1, 2022, doi:
- 1069 10.1080/15476286.2022.2043040.
- 1070 [83] S. Hadar, A. Meller, and R. Shalgi, “Stress-induced transcriptional readthrough into
- 1071 neighboring genes is linked to intron retention,” *bioRxiv*, p. 2022.03.24.485601, Mar. 2022,
- 1072 doi: 10.1101/2022.03.24.485601.
- 1073 [84] P. Till, R. L. Mach, and A. R. Mach-Aigner, “A current view on long noncoding RNAs in yeast
- 1074 and filamentous fungi,” *Applied Microbiology and Biotechnology*, vol. 102, no. 17. Springer
- 1075 Verlag, pp. 7319–7331, Sep. 01, 2018, doi: 10.1007/s00253-018-9187-y.
- 1076 [85] N. Liu *et al.*, “Long Non-Coding RNAs profiling in pathogenesis of *Verticillium dahliae*: New
- 1077 insights in the host-pathogen interaction,” *Plant Sci.*, vol. 314, p. 111098, Jan. 2022, doi:
- 1078 10.1016/j.plantsci.2021.111098.
- 1079 [86] Y. Arthanari, C. Heintzen, S. Griffiths-Jones, and S. K. Crosthwaite, “Natural Antisense
- 1080 Transcripts and Long Non-Coding RNA in *Neurospora crassa*,” *PLoS One*, vol. 9, no. 3, p.
- 1081 e91353, Mar. 2014, doi: 10.1371/journal.pone.0091353.
- 1082 [87] R. Li *et al.*, “Identification of long non-coding RNAs in *Verticillium dahliae* following inoculation
- 1083 of cotton,” *Microbiol. Res.*, vol. 257, Apr. 2022, doi: 10.1016/j.micres.2022.126962.
- 1084 [88] I. A. Cemel, N. Ha, G. Schermann, S. Yonekawa, and M. Brunner, “The coding and noncoding
- 1085 transcriptome of *Neurospora crassa*,” *BMC Genomics*, vol. 18, no. 1, Dec. 2017, doi:
- 1086 10.1186/s12864-017-4360-8.
- 1087 [89] J. Li *et al.*, “New insights into the evolution of subtilisin-like serine protease genes in
- 1088 *Pezizomycotina*,” *BMC Evol. Biol.*, vol. 10, no. 1, 2010, doi: 10.1186/1471-2148-10-68.
- 1089 [90] A. Muszewska, J. W. Taylor, P. Szczesny, and M. Grynberg, “Independent subtilases
- 1090 expansions in fungi associated with animals,” *Mol. Biol. Evol.*, vol. 28, no. 12, pp. 3395–3404,
- 1091 Dec. 2011, doi: 10.1093/molbev/msr176.
- 1092 [91] J. Figueiredo, M. Sousa Silva, and A. Figueiredo, “Subtilisin-like proteases in plant defence: the
- 1093 past, the present and beyond,” *Molecular Plant Pathology*, vol. 19, no. 4. Blackwell Publishing
- 1094 Ltd, pp. 1017–1028, Apr. 01, 2018, doi: 10.1111/mpp.12567.
- 1095 [92] A. Figueiredo, F. Monteiro, and M. Sebastiana, “Subtilisin-like proteases in plant–pathogen
- 1096 recognition and immune priming: A perspective,” *Front. Plant Sci.*, vol. 5, no. DEC, Dec. 2014,
- 1097 doi: 10.3389/fpls.2014.00739.
- 1098 [93] Z. Li *et al.*, “Transcriptional Landscapes of Long Non-coding RNAs and Alternative Splicing in
- 1099 *Pyricularia oryzae* Revealed by RNA-Seq,” *Front. Plant Sci.*, vol. 12, 2021, doi:
- 1100 10.3389/fpls.2021.723636.
- 1101 [94] J. M. Myers and T. Y. James, “Mycoviruses,” *Current Biology*, vol. 32, no. 4. Cell Press, pp.
- 1102 R150–R155, Feb. 28, 2022, doi: 10.1016/j.cub.2022.01.049.
- 1103 [95] M. Dubarry *et al.*, “Gmove a tool for eukaryotic gene predictions using various evidences,”
- 1104 *F1000Research*, vol. 5, Apr. 2016, doi: 10.7490/F1000RESEARCH.1111735.1.
- 1105 [96] M. S. Campbell, C. Holt, B. Moore, and M. Yandell, “Genome Annotation and Curation Using
- 1106 MAKER and MAKER-P,” *Curr. Protoc. Bioinforma.*, vol. 48, pp. 4.11.1-39, Dec. 2014, doi:
- 1107 10.1002/0471250953.bi0411s48.
- 1108 [97] D. S. Standage, “AEGeAn: an integrated toolkit for analysis and evaluation of annotated
- 1109 genomes,” 2015. <http://standage.github.io/AEGeAn>.
- 1110 [98] L. Gabriel, K. J. Hoff, T. Brůna, M. Borodovsky, and M. Stanke, “TSEBRA: transcript selector for
- 1111 BRAKER,” *BMC Bioinformatics*, vol. 22, no. 1, p. 566, Dec. 2021, doi: 10.1186/s12859-021-
- 1112 04482-0.
- 1113

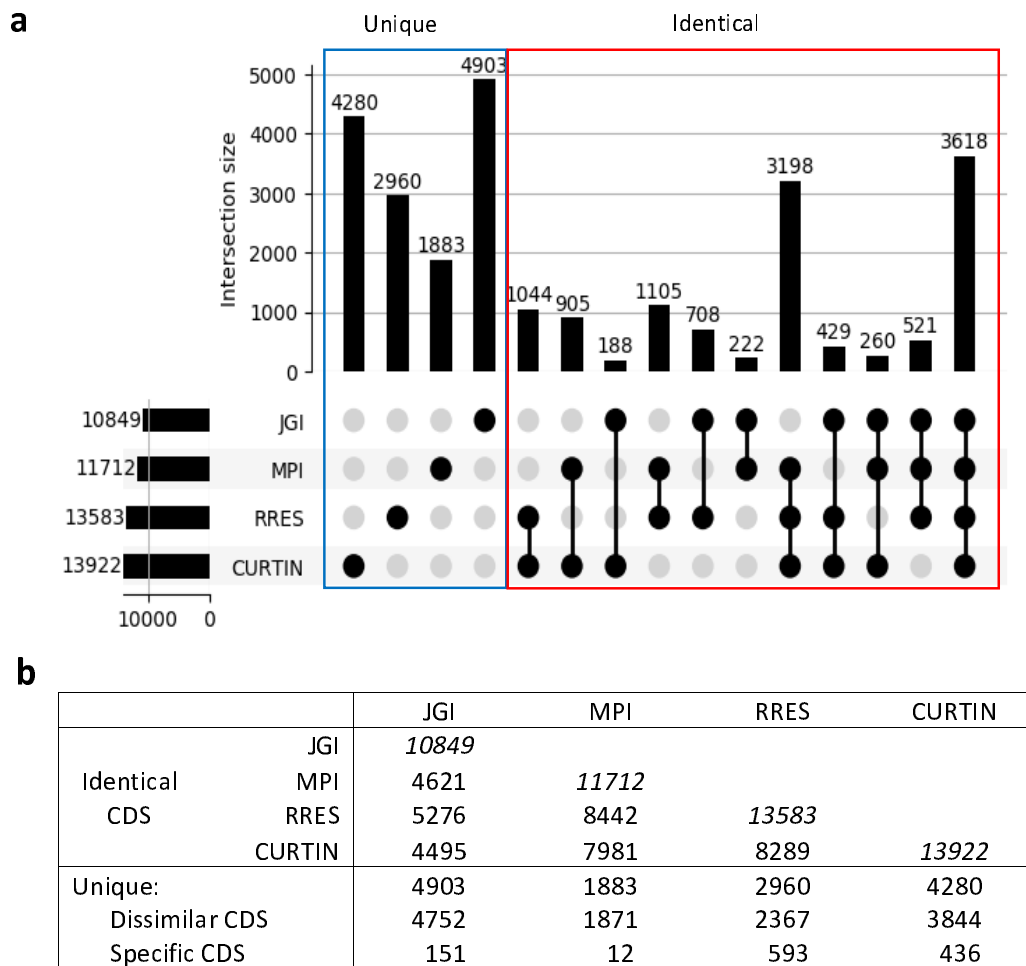

**Figure 1.** Comparison of *Zymoseptoria tritici* reference isolate IPO323 genome annotations. **a)** Upset plot of the gene models from the four annotations of IPO323 (JGI, MPI, RRES and CURTIN). Number of gene models with identical coding sequences (CDS). **b)** Comparison of IPO323 gene annotations. Number of CDS in each annotation. Identical CDS: identical CDS at a given locus. Unique Dissimilar CDS: at a given locus, a CDS is predicted by at least one other annotation, but they differ in their structure. Unique Specific CDS: at a given locus, a single CDS is predicted by a single annotation.

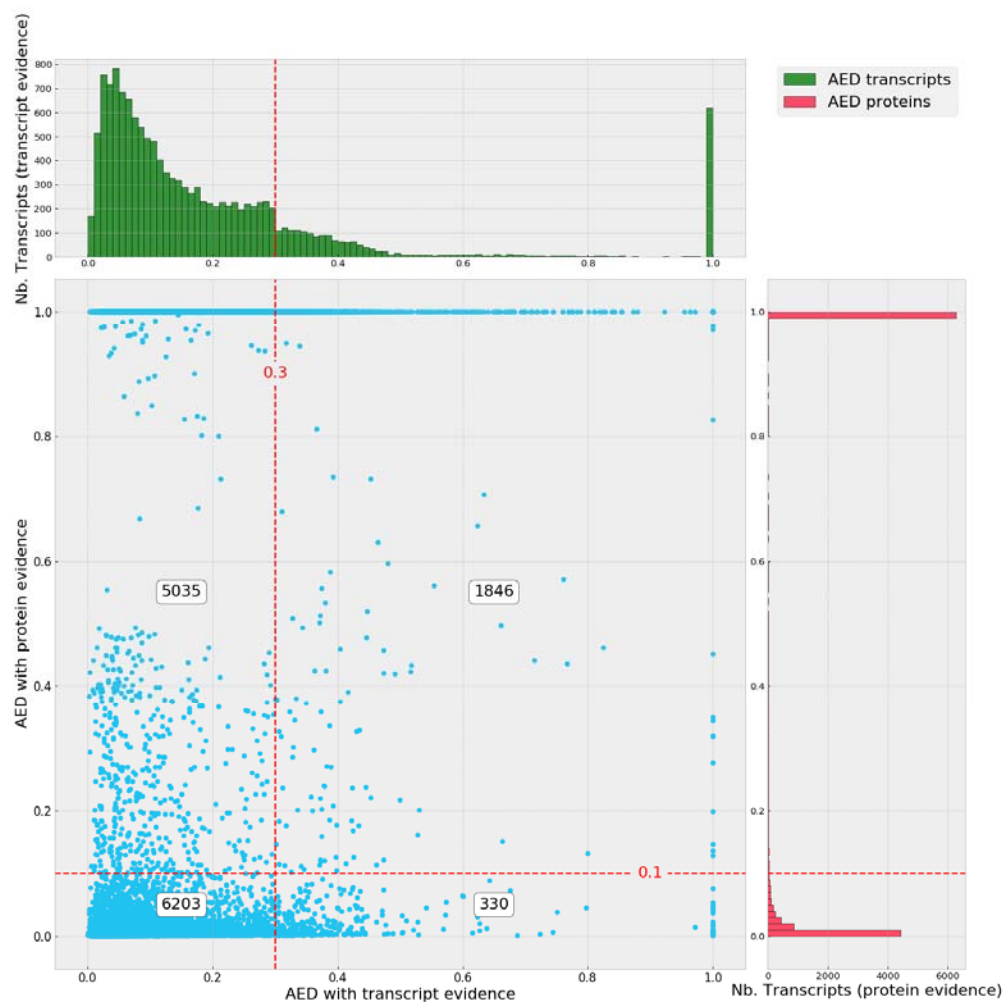

**Figure 2.** Selection of the best Re-annotated Gene Models (RGMs) according to their Annotation Edit Distance (AED) scores.

Plot of RGM AED scores. AED scores (0-1) describe how a given gene model fits to transcript and protein evidence (best fit = 0). Transcript evidence was computed from RNA-Seq or Iso-Seq data (X axis). Protein evidence was computed from fungal protein sequences excluding *Zygomycota* species (Y axis). The red, dashed lines represent the AED thresholds to filter out genes (0.3 for transcripts, 0.1 for proteins), except if they are supported by at least four different annotations (1846 RGMs, upper right area of the graph). The numbers of genes in the four areas are displayed in white text boxes. Numbers of transcripts with transcript evidence were plotted on cumulative histograms above the scatter plot (green). Numbers of transcripts with protein evidence were plotted on cumulative histograms on the right of the scatter plot (red).

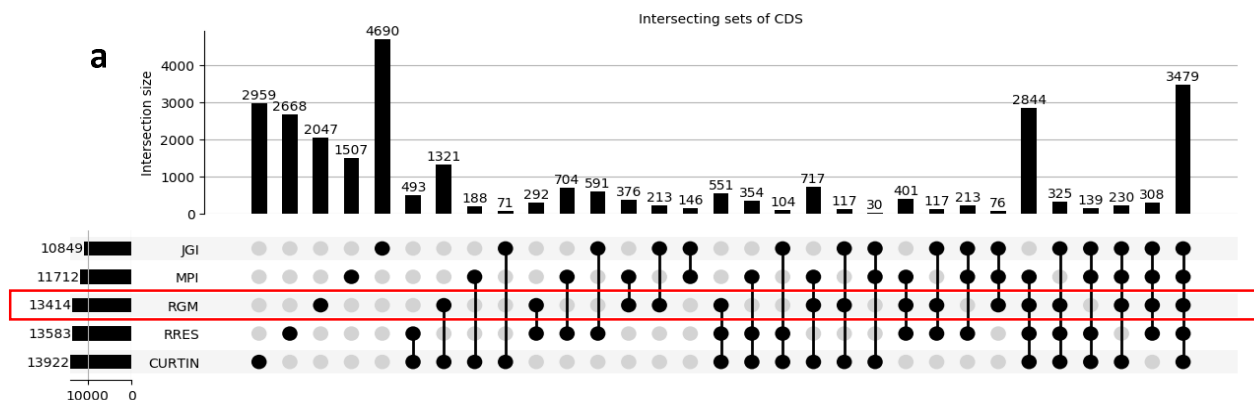

**Figure 3.** Comparison of the novel IPO323 genome annotation (Re-annotated Gene Models, RGM) with the four available annotations

a) Upsetplot of RGMs with gene models from the four available annotations (JGI, MPI, RRES and CURTIN). Number of shared (identical) gene models for coding sequences (CDS).

b) Number of identical CDS between RGMs and each available annotation.

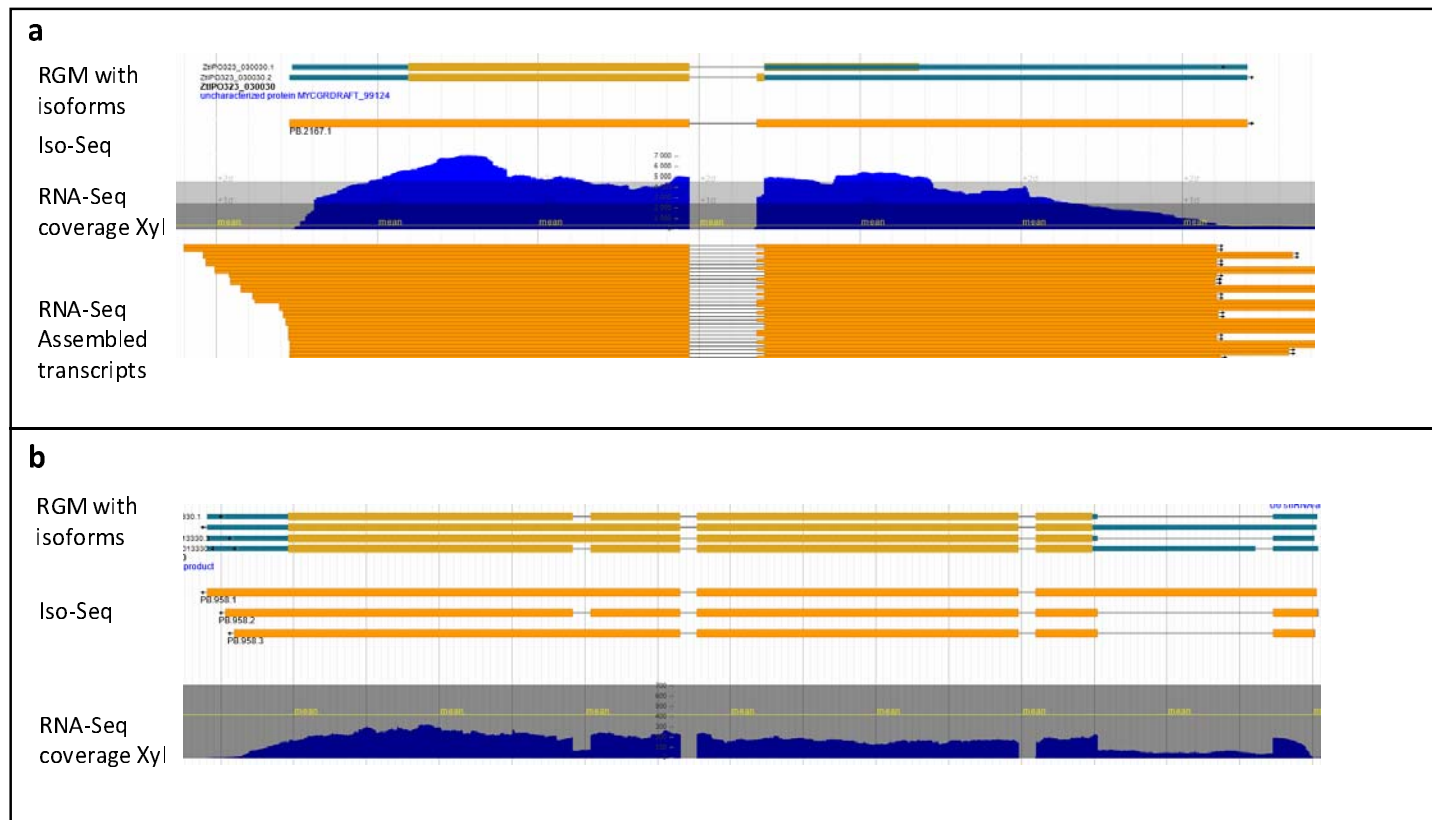

**Figure 4.** Transcript isoforms of Re-annotated Gene Models (RGMs) ZtIPO323\_030030 (a) and ZtIPO323\_013330 (b) supported by Iso-Seq and RNA-Seq evidence.

a) Gene ZtIPO323\_030030 (chr2: 777930...1778675, 747 b). This RGM has two transcript isoforms (alternative 3' acceptor site). Both encoded Small Secreted Proteins (SSP 10, File S1). Previous annotations selected the second acceptor site leading to the longest CDS. A single Iso-Seq transcript corresponding to the longest CDS was detected (Iso-Seq track), while both isoforms were detected using RNA-Seq data (RNA-Seq assembled transcript). RNA-seq coverage identified both isoforms in equal amounts (RNA-Seq coverage Xyl). Based on read coverage from different RNA-Seq libraries, the isoform corresponding to the shortest CDS was the most frequent. This isoform was likely the canonical form and encoded a protein with a C-terminus that was reduced in length by 34% compared to the other isoform. RGMs with isoforms track: different isoforms. Iso-Seq track: filtered Iso-Seq transcripts. RNA-Seq coverage Xyl track: coverage of strand-specific RNA-Seq reads. RNA-Seq assembled transcript track: assembly of strand-specific RNA-Seq reads.

b) ZtIPO323\_013330 (chr\_1:3420115..3424093, 3.98 Kb). This RGM had four transcript isoforms. The selected RGM had four splicing sites, one of which in the 5' UTR was supported by Iso-Seq transcript (Iso-Seq n°2) and RNA-Seq (RNA-Seq coverage Xyl). Two Iso-Seq transcripts with one or two intron retention events were detected as Iso-Seq transcripts (Iso-Seq n°1 and 3) and confirmed by RNA-Seq (RNA-Seq coverage Xyl). One Iso-Seq transcript had an alternative 5' donor splicing site in the 5' UTR (Iso-Seq n°4). This isoform was likely weakly expressed, as it was not supported by RNA-Seq (RNA-Seq coverage Xyl). RGMs with isoforms track: different RGM isoforms. Iso-seq track: filtered Iso-seq transcripts. RNA-Seq coverage Xyl track: coverage of strand-specific RNA-Seq reads. RNA-Seq assembled transcript track: assembly of strand-specific RNA-Seq reads.

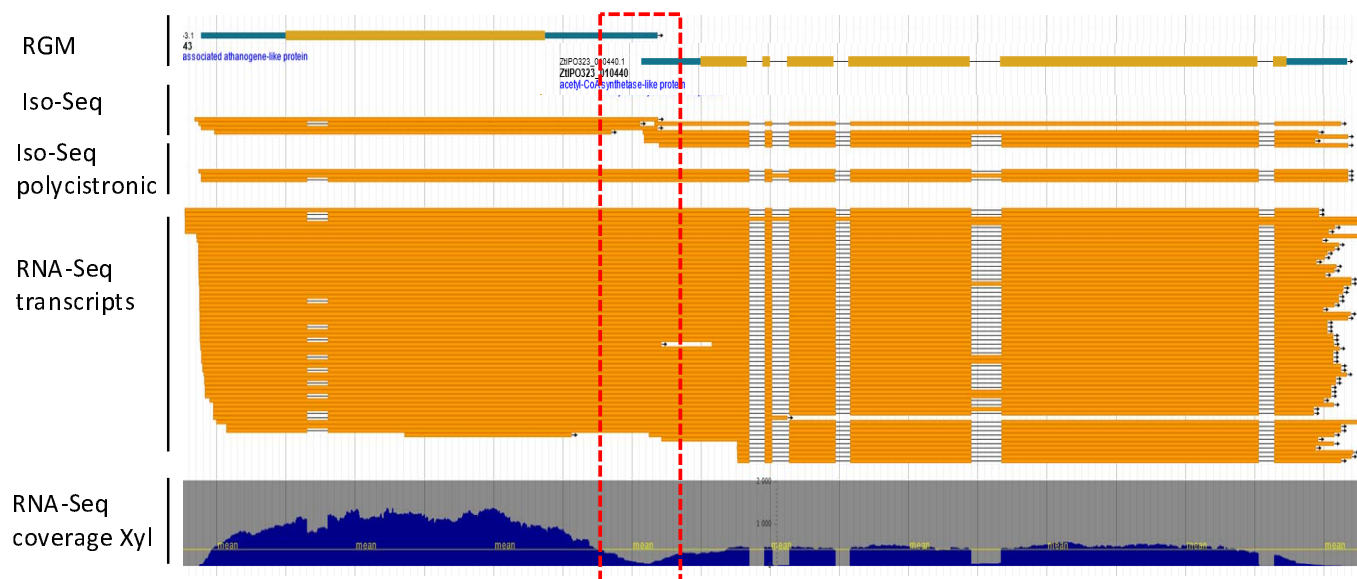

**Figure 5.** Examples of polycistronic transcripts shown for Re-annotated Gene Models (RGMs) ZtIPO323\_010430 and ZtIPO323\_010440

RGMs ZtIPO323\_010430 and ZtIPO323\_010440, located at chr\_1:2692858...2697168 and chr\_1:2692858...2697168, respectively, were transcribed on the same strand with overlapping 3'UTR and 5'UTR (red rectangle). Iso-Seq polycistronic track: evidence of transcripts covering the two RGMs. A strong decrease in RNA-Seq coverage was observed in the region of the overlap (red dashed rectangle), suggesting two singles, overlapping transcripts. The assembly of RNA-Seq reads led to a polycistronic transcript involving the two RGMs, likely resulting from the wrong assembly of reads from these overlapping transcripts. Iso-seq track: filtered Iso-seq transcripts mapping at this locus. Iso-Seq polycistronic track: polycistronic transcripts identified in the Iso-Seq database. RNA-seq transcript track: assembly of strand-specific RNA-Seq reads mapping at this locus. RNA-seq coverage Xyl track: coverage of strand-specific RNA-Seq reads mapping at this locus.

| Categories                                 | Counts |
|--------------------------------------------|--------|
| Full-splice_match (FSM) <sup>1</sup>       | 7872   |
| Incomplete-splice_match (ISM) <sup>2</sup> | 305    |
| Fusion                                     | 45     |
| Genic <sup>3</sup>                         | 664    |
| Intron retention (IR)                      | 1571   |
| novel_in_catalog (NIC) <sup>4</sup>        | 7      |
| novel_not_in_catalog (NNC) <sup>5</sup>    | 474    |
| Antisense                                  | 395    |
| Intergenic                                 | 357    |

<sup>1</sup> Whole transcripts with possible alternative 3' and 5' ends

<sup>2</sup> Partial overlaps of transcripts fitting with intron coordinates

<sup>3</sup> Partial overlaps of introns and exons not compliant with intron/exon coordinates

<sup>4</sup> Use combination\_of\_known\_splice sites

<sup>5</sup> At\_least\_one\_novel\_splice site detected

**Table 1.** Classification of Iso-Seq transcript isoforms from *Zymoseptoria tritici* isolate IPO323

Filtered Iso-Seq transcripts from different growth conditions were analysed and classified with Sqanti3.
